# Supplementary material for: Label-free metabolic imaging for sensitive and robust monitoring of anti-CD47 immunotherapy response in triple-negative breast cancer
Source: PubMed Central journal article supplement — J Immunother Cancer. 2022 Sep 12;10(9):e005199. doi: 10.1136/jitc-2022-005199 (PMC9472253; doi:10.1136/jitc-2022-005199), 2022-09-12

## Label-free metabolic imaging for sensitive and robust monitoring of anti-CD47 immunotherapy response in triple-negative breast cancer

### Authors

Minfeng Yang, Arpan Mahanty, Chunjing Jin, Alex Nagi Nick Wong, Jung Sun Yoo

### Correspondence

[jungsun.yoo@polyu.edu.hk](mailto:jungsun.yoo@polyu.edu.hk)

### In Brief

This study presents the potential of a label-free metabolic intravital imaging technique to visualize dynamic changes of cancer and immune cells' metabolism for sensitive monitoring of anti-CD47 immunotherapy response. This imaging approach provides reliable imaging biomarkers to select the patients who are most likely benefit from immunotherapy at early time points.

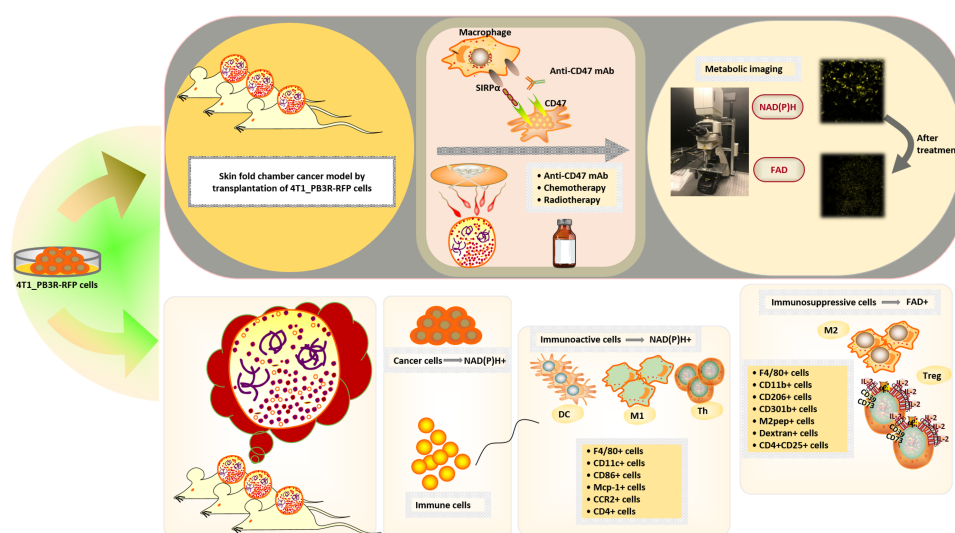

Supplement: jitc-2022-005199supp001.pdf [file jitc-2022-005199supp001.pdf]
