# Supplementary material for: Label-free metabolic imaging for sensitive and robust monitoring of anti-CD47 immunotherapy response in triple-negative breast cancer
Source: PubMed Central journal article supplement — J Immunother Cancer. 2022 Sep 12;10(9):e005199. doi: 10.1136/jitc-2022-005199 (PMC9472253; doi:10.1136/jitc-2022-005199), 2022-09-12
Supplement: jitc-2022-005199supp002.pdf [file jitc-2022-005199supp002.pdf]

## Supplementary Information

### Label-free metabolic imaging for sensitive and robust monitoring of anti-CD47 immunotherapy response in triple-negative breast cancer

Minfeng Yang<sup>1</sup>, Arpan Mahanty<sup>1</sup>, Chunjing Jin<sup>2</sup>, Alex Ngai Nick Wong<sup>1</sup>, Jung Sun Yoo<sup>1\*</sup>

<sup>1</sup>Department of Health Technology and Informatics, The Hong Kong Polytechnic University,  
Kowloon, Hong Kong

<sup>2</sup>Laboratory Medicine Center, The Affiliated Chuzhou Hospital of Anhui Medical University, The  
First People's Hospital of Chuzhou, Chuzhou, China.

\*Correspondence to Dr Jung Sun Yoo; [jungsun.yoo@polyu.edu.hk](mailto:jungsun.yoo@polyu.edu.hk), Tel: +852-3400-8654,

Address: Room Y905, 9/F, Lee Shau Kee Building, The Hong Kong Polytechnic University, Hung  
Hom, Kowloon, Hong Kong

# List of Supplementary Items

**Supplementary Figure 1.** Development of a murine skinfold model of triple-negative breast cancer

**Supplementary Figure 2.** Dynamic metabolic imaging of NAD(P)H before and after treatment of isotype control antibody

**Supplementary Figure 3.** Dynamic metabolic imaging of FAD before and after treatment of isotype control antibody

**Supplementary Figure 4.** Sensitive monitoring of paclitaxel chemotherapy response by dynamic metabolic imaging of NAD(P)H

**Supplementary Figure 5.** Sensitive monitoring of paclitaxel chemotherapy response by dynamic metabolic imaging of FAD

**Supplementary Figure 6.** Sensitive monitoring of zoledronic acid chemotherapy response by dynamic metabolic imaging of NAD(P)H

**Supplementary Figure 7.** Sensitive monitoring of zoledronic acid chemotherapy response by dynamic metabolic imaging of FAD

**Supplementary Figure 8.** Sensitive monitoring of radiotherapy response by dynamic metabolic imaging of NAD(P)H

**Supplementary Figure 9.** Sensitive monitoring of radiotherapy response by dynamic metabolic imaging of FAD

**Supplementary Figure 10.** Intravital imaging reveals co-localization of NAD(P)H<sup>hi</sup> cells and M1 macrophages in tumor microenvironment

**Supplementary Figure 11.** Intravital imaging reveals co-localization of FAD<sup>hi</sup> and CD11b<sup>+</sup> macrophages in tumor microenvironment

**Supplementary Figure 12.** Intravital imaging reveals co-localization of FAD<sup>hi</sup> cells and M2 macrophages in tumor microenvironment

**Supplementary Figure 13.** Histological examination of tumor-associated macrophages' polarization by anti-CD47 therapy

**Supplementary Figure 14.** Histological examination of tumor-associated macrophages' polarization by zoledronic acid chemotherapy

**Supplementary Figure 15.** Histological examination of tumor-associated macrophages' polarization by radiotherapy

**Supplementary Table 1.** Lists of antibodies, imaging probes, immune checkpoint inhibitors, and chemotherapeutic drugs

**Supplementary Video Legends**

## Supplementary Figure 1

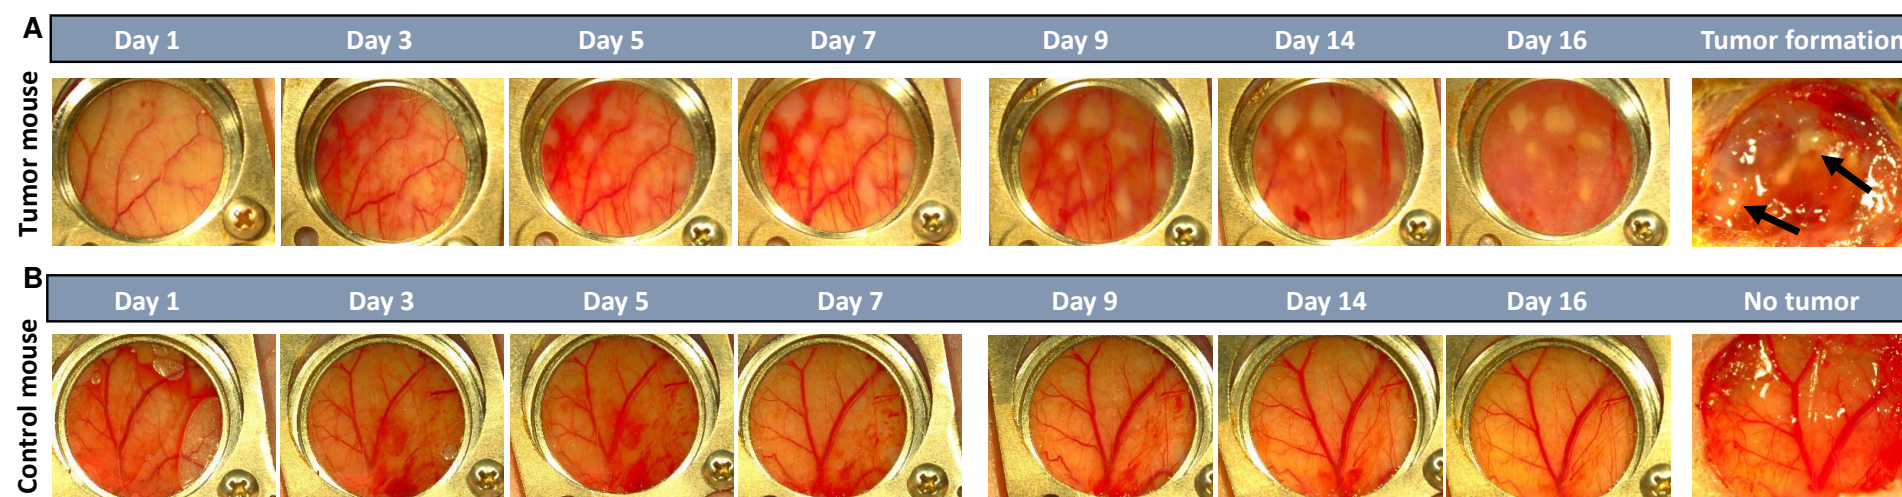

**Development of a murine skinfeld model of triple-negative breast cancer.** A whole course of time-lapse anatomical imaging of tumor growth in a mouse skinfold window chamber model of triple-negative breast cancer (**A**) by comparison with a control mouse (**B**). Color anatomy shows formation of tumor nodules and angiogenesis in a skinfold window chamber of a tumor model in a course of 16 days compared to a control mouse. Tumor formation was clearly confirmed after removing the window chamber (arrows).

## Supplementary Figure 2

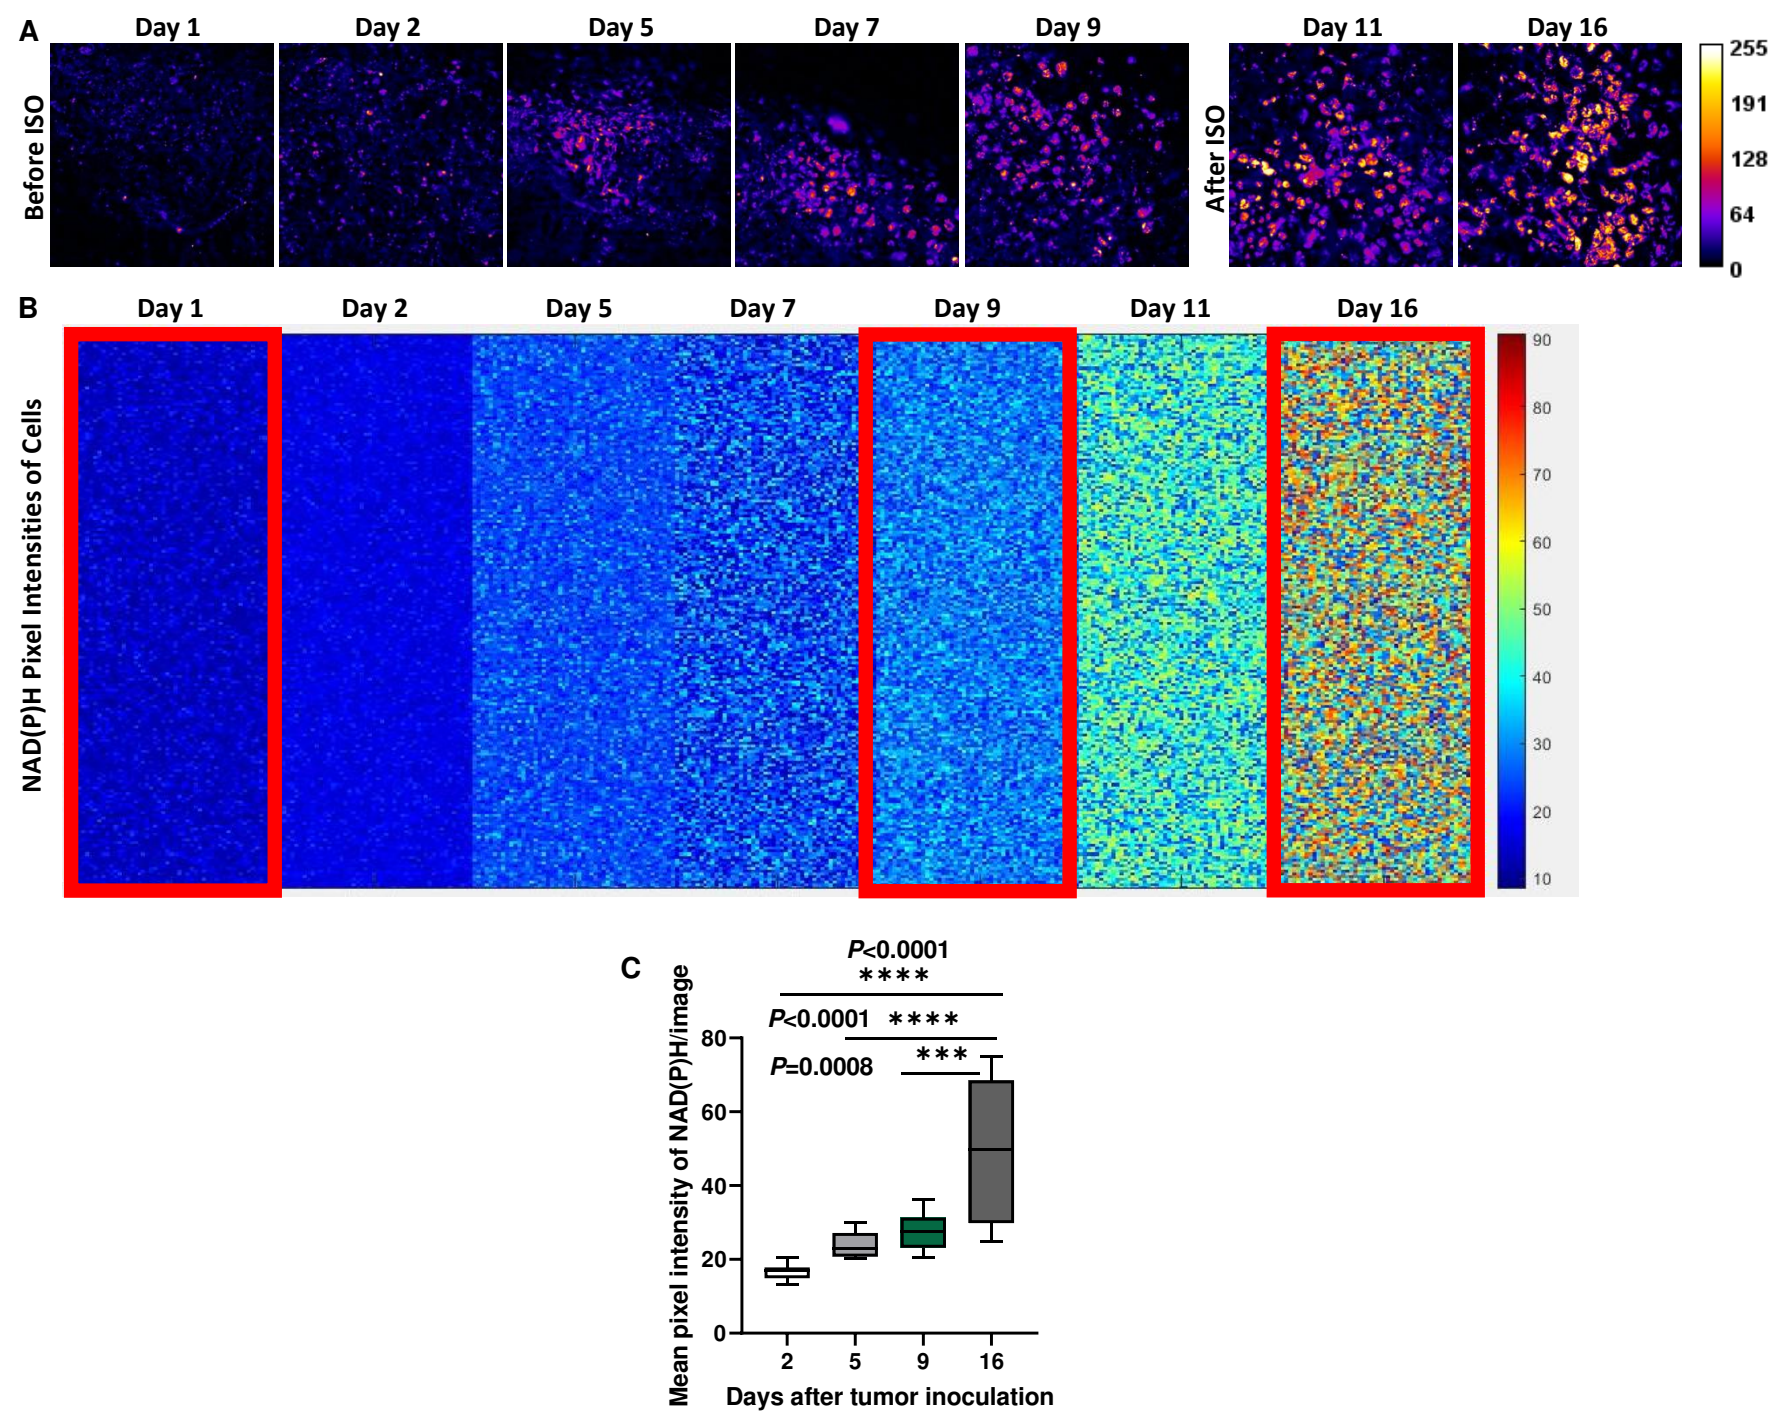

**Dynamic metabolic imaging of NAD(P)H before and after treatment of isotype control antibody.** (A) Label-free metabolic intravital imaging (LMMI) of NAD(P)H before and after treatment of isotype control antibody showing continuous tumor growth (10 mg/kg intravenous injection daily for 5 days). (B) Kinetics of single cell metabolism with NAD(P)H signal. Each colored small square represents the visible pixel intensity of NAD(P)H in each cancer cell. 10,000-pixel intensities were randomly measured from the cells in different mice every day for 16 days (n=5 mice). Metabolic signal of NAD(P)H has been increased with tumor growth from Day 1 to Day 9 and continued to increase even with start of isotype control treatment from Day 10 as expected. (C) Quantification of average intensity shows clear increasing trend of NAD(P)H signal (n=14 images).

## Supplementary Figure 3

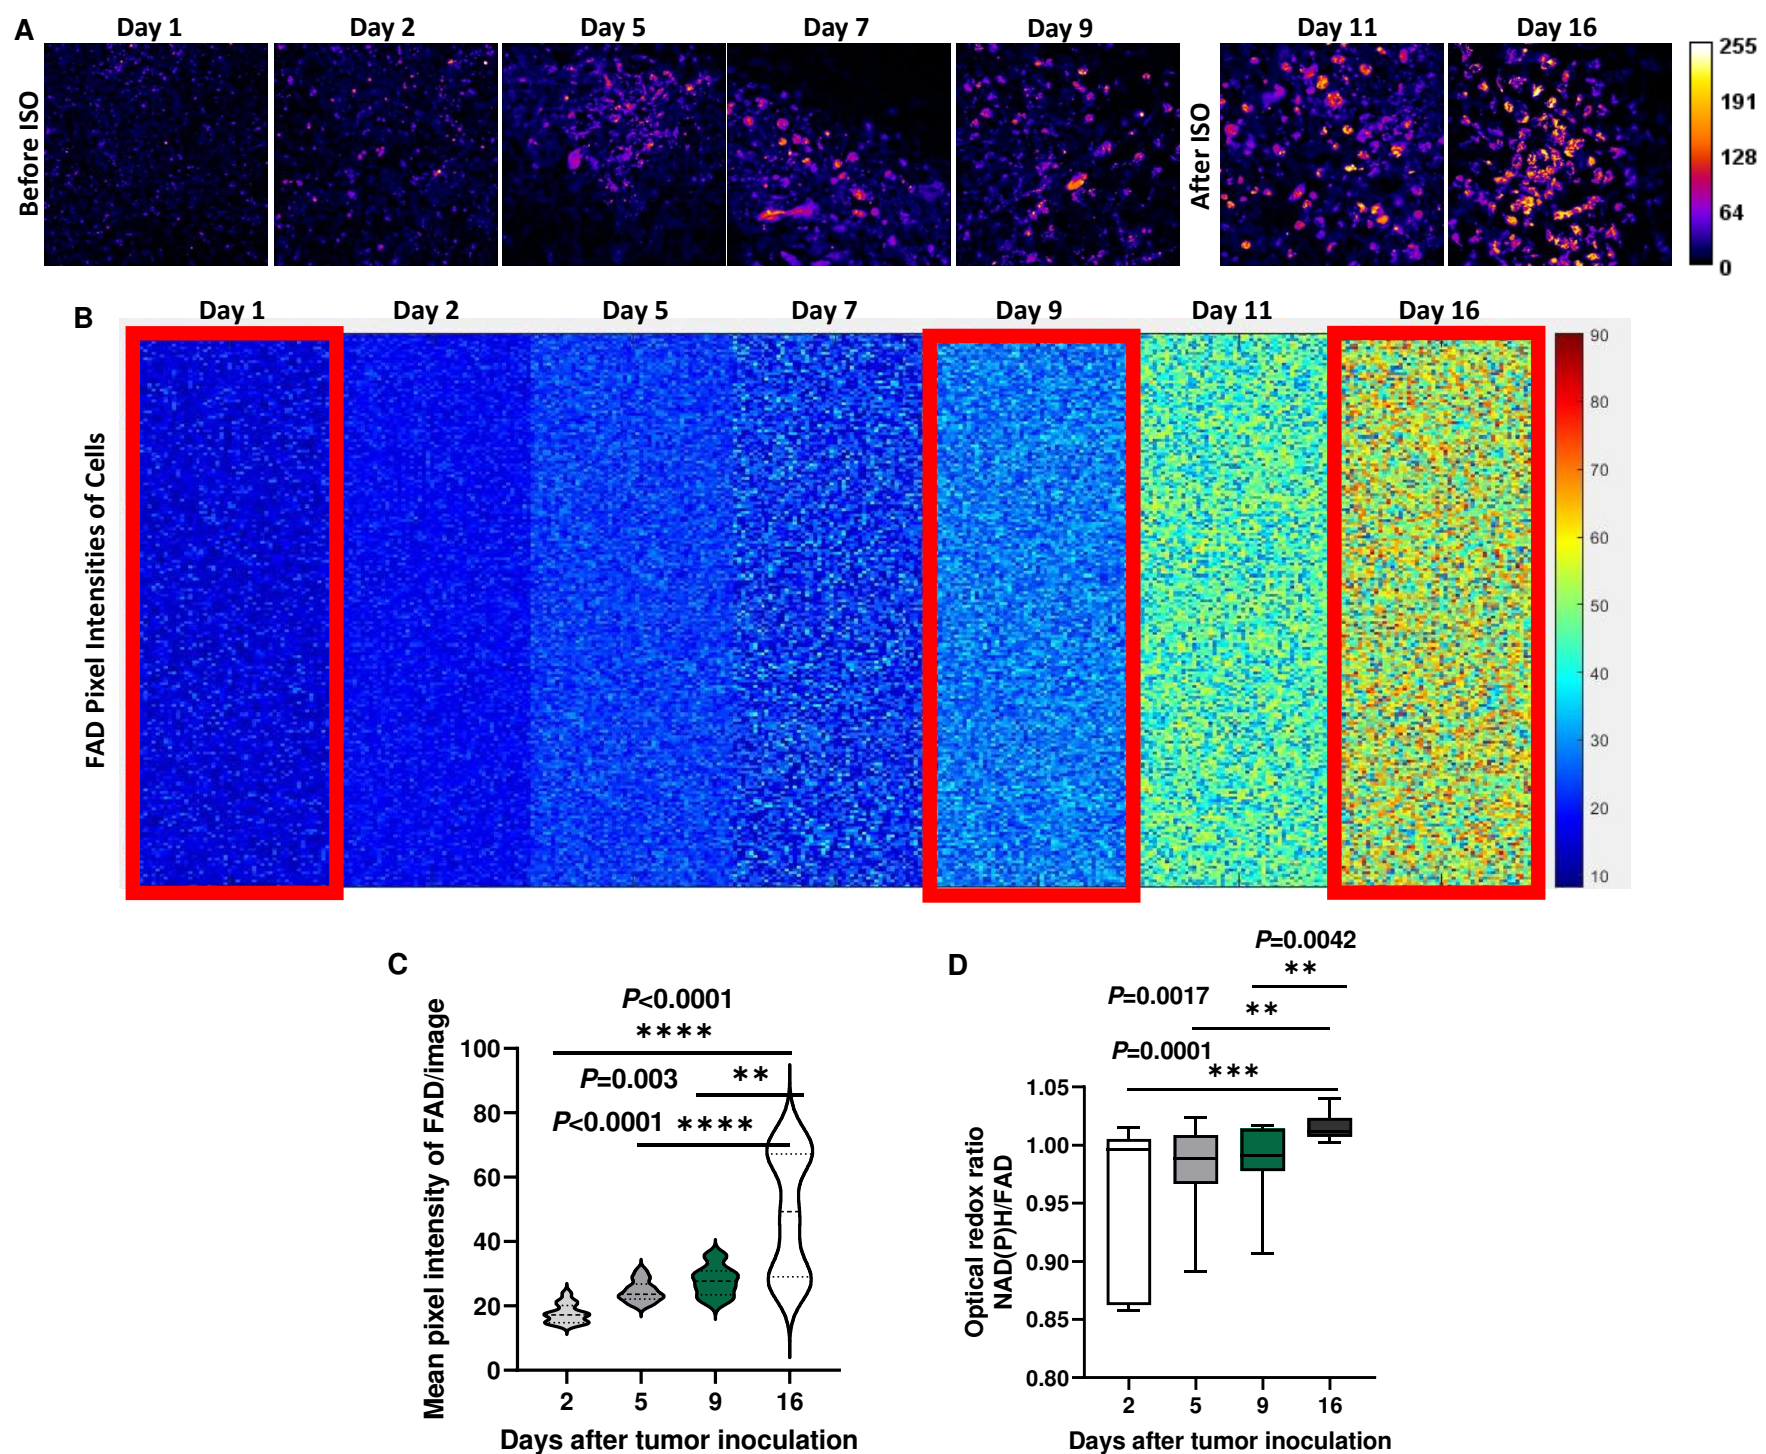

**Dynamic metabolic imaging of FAD before and after treatment of isotype control antibody.** (A) Label-free metabolic intravital imaging (LMMI) of FAD before and after treatment of isotype control antibody showing continuous tumor growth (10 mg/kg intravenous injection daily for 5 days). (B) Kinetics of single cell metabolism with FAD signal. Each colored small square represents the visible pixel intensity of FAD in each cancer cell. 10,000-pixel intensities were randomly measured from the cells in different mice every day for 16 days (n=5 mice). Metabolic signal of NAD(P)H has been increased with tumor growth from Day 1 to Day 9 and continued to increase even with start of isotype control treatment from Day 10 as expected. (C) Quantification of average intensity shows clear increasing trend of FAD signal (n=14 images). (D) Optical redox ratio measurement shows a similar increasing trend (n=14 images).

## Supplementary Figure 4

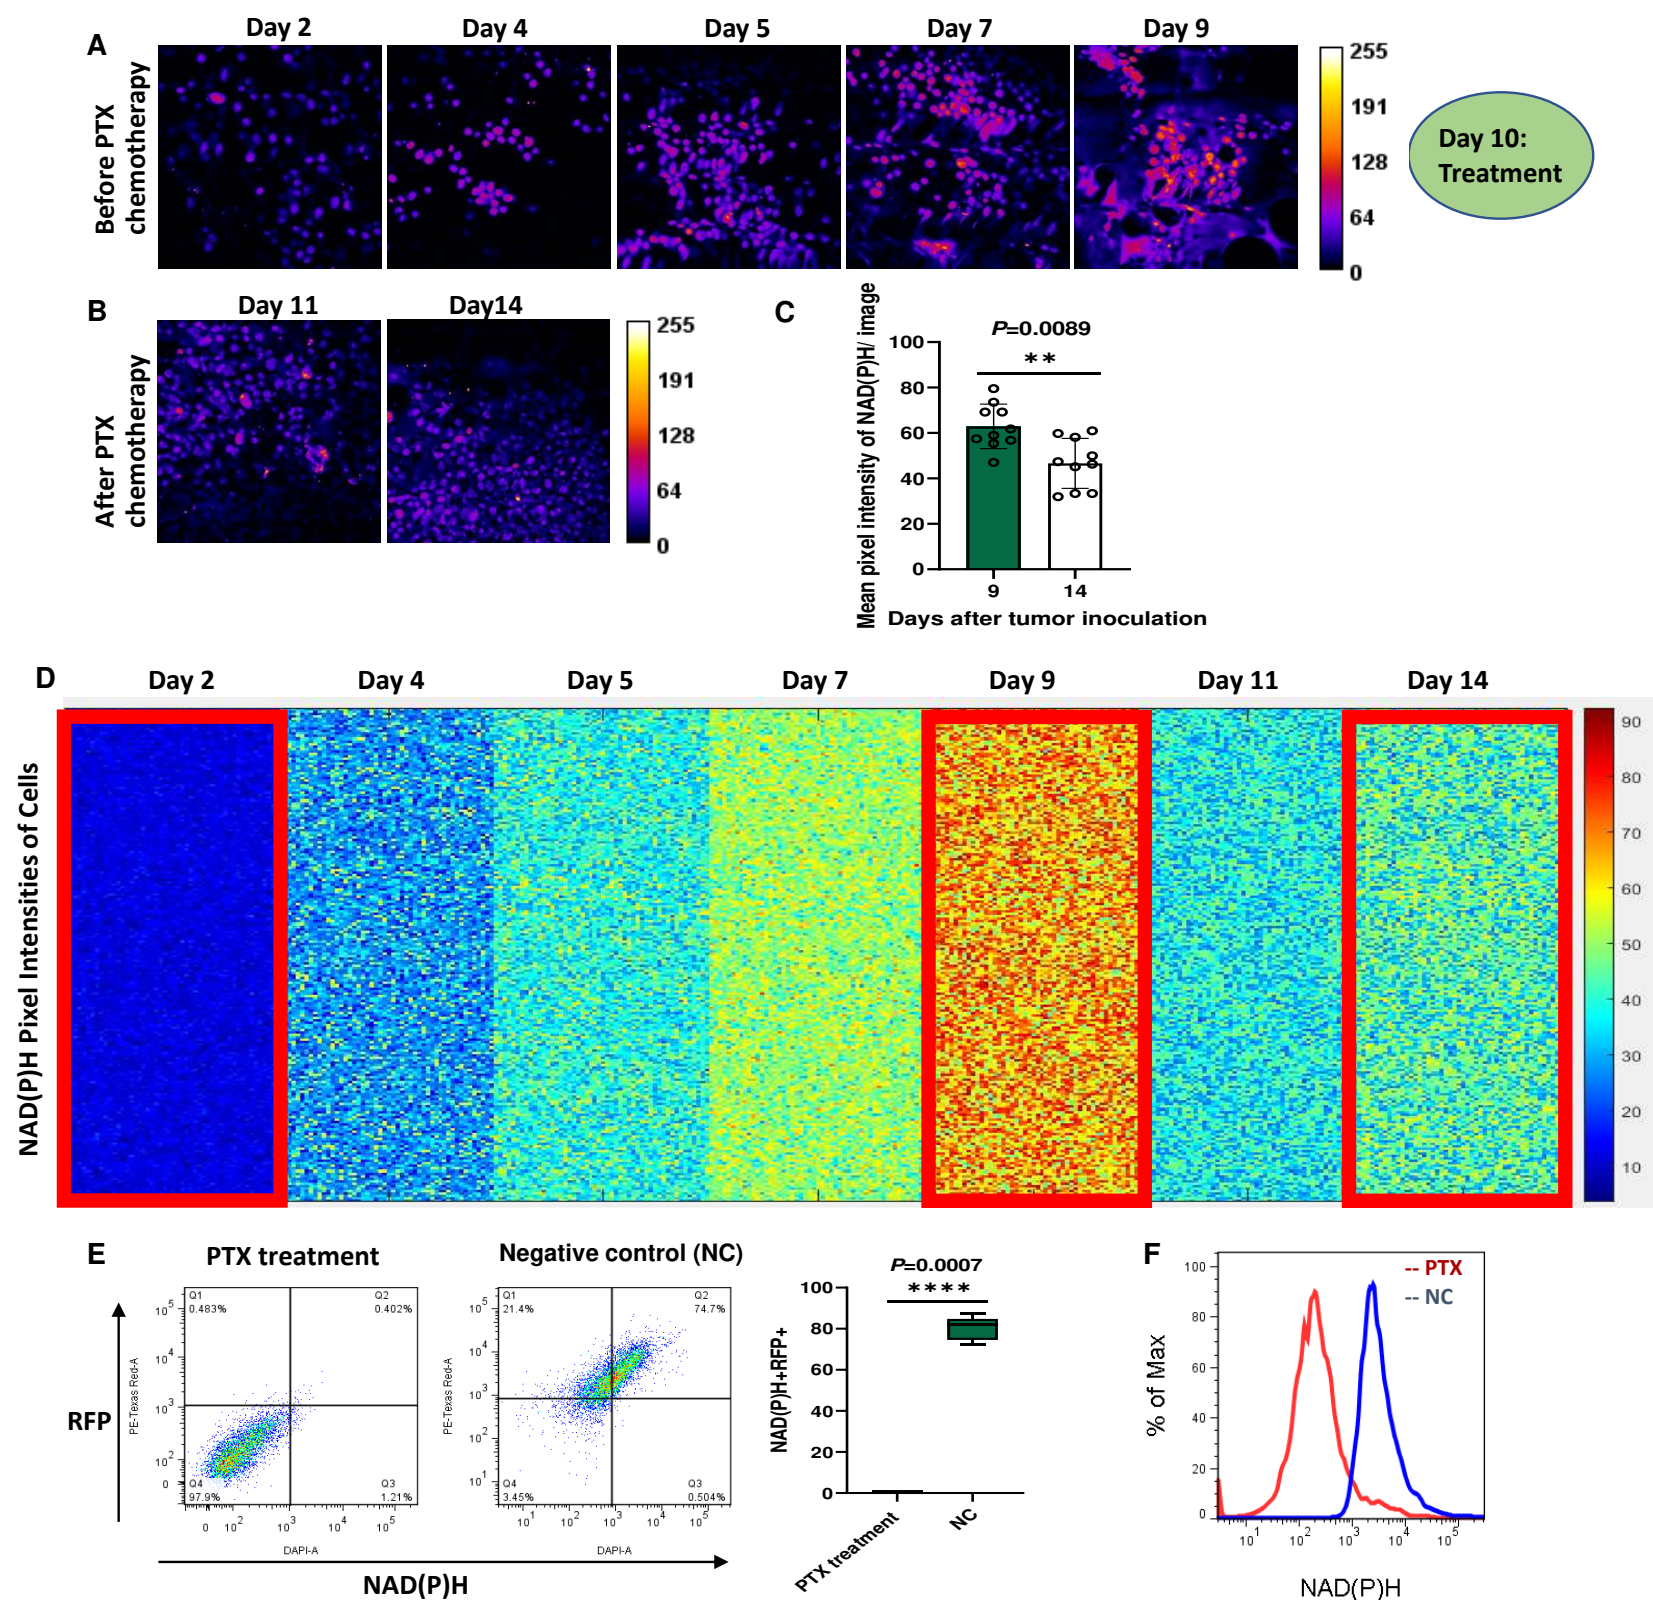

**Sensitive monitoring of paclitaxel chemotherapy response by dynamic metabolic imaging of NAD(P)H.** (A, B) Label-free metabolic intravital imaging (LMII) of NAD(P)H demonstrates sensitive early response at single-cell level after paclitaxel (PTX) treatment (10 mg/kg intraperitoneal injection on Day 10). (C) Quantification of average intensity shows statistically significant difference in NAD(P)H signals before and after PTX treatment ( $n=10$  images,  $P=0.0089$  for Day 9 and Day 14). (D) Kinetics of single cell metabolism with NAD(P)H signal. Each colored small square represents the visible pixel intensity of NAD(P)H in each cancer cell. 10,000-pixel intensities were randomly measured from the cells in different mice every day for 16 days ( $n=8$  mice). Metabolic signal of NAD(P)H has been increased with tumor growth from Day 1 to Day 9 and dramatically decreased with start of PTX treatment from Day 10. (E) Flow cytometric analysis shows decrease of NAD(P)H+RFP+ cells after PTX treatment ( $n=15$  mice,  $P=0.0007$ ). (F) Decreased NAD(P)H signal with PTX treatment compared to negative control treatment was confirmed by flow cytometry.

## Supplementary Figure 5

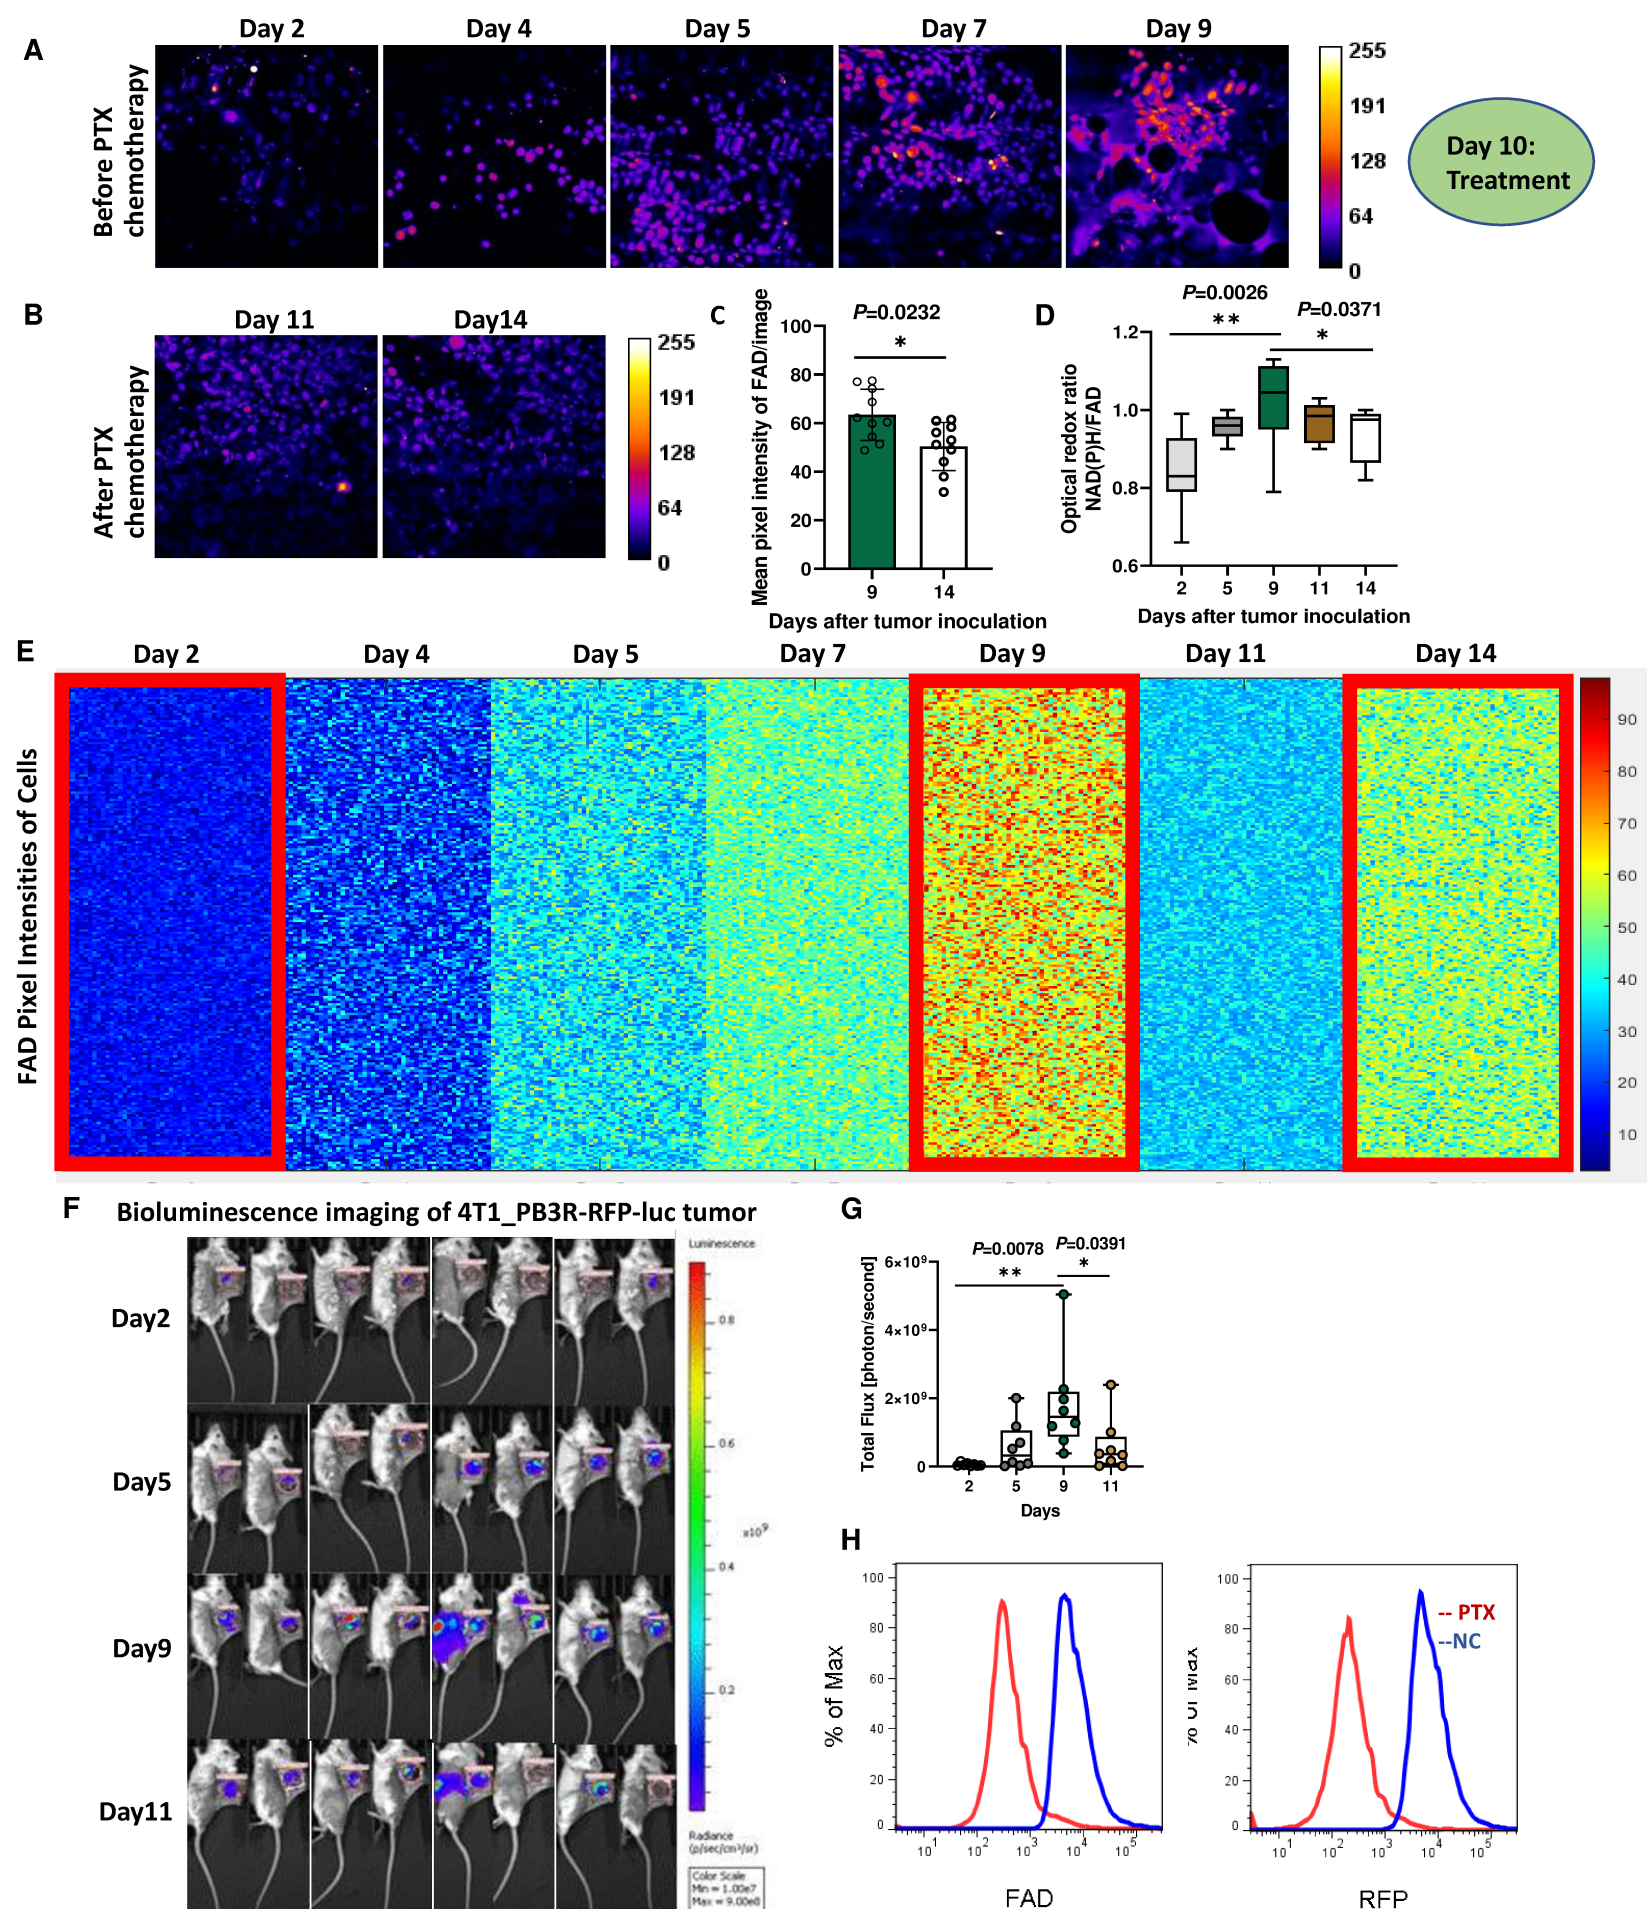

**Sensitive monitoring of paclitaxel chemotherapy response by dynamic metabolic imaging of FAD.** (A, B) Label-free metabolic intravital imaging (LMII) of FAD demonstrates sensitive early response at single-cell level after paclitaxel (PTX) treatment (10 mg/kg intraperitoneal injection daily for 5 days). (C) Quantification of average intensity shows statistically significant difference in FAD signals before and after PTX treatment ( $n=10$  images,  $P=0.0232$ ). (D) Optical redox ratio was increased with tumor growth and decreased with PTX treatment ( $n=10$  images,  $P=0.0371$  for Day 9 and Day 14). (E) Kinetics of single cell metabolism with FAD signal. Each colored small square represents the visible pixel intensity of FAD in each cancer cell. 10,000-pixel intensities were randomly measured from the cells in different mice every day for 16 days ( $n=8$  mice). Metabolic signal of FAD has been increased with tumor growth from Day 1 to Day 9 and dramatically decreased with start of PTX treatment from Day 10. (F, G) Conventional whole-body bioluminescence imaging of 4T1\_PB3R-RFP-luc tumor mice verified cancer treatment with increased signal before PTX therapy and decreased signal after PTX therapy. LMII shows better sensitivity to detect chemotherapy response ( $P=0.0232$  in C) over bioluminescence imaging ( $P=0.0391$  in G). (H) Flow cytometric analysis shows decrease of FAD+ cells and 4T1\_PB3R-RFP+ cells after PTX treatment.

## Supplementary Figure 6

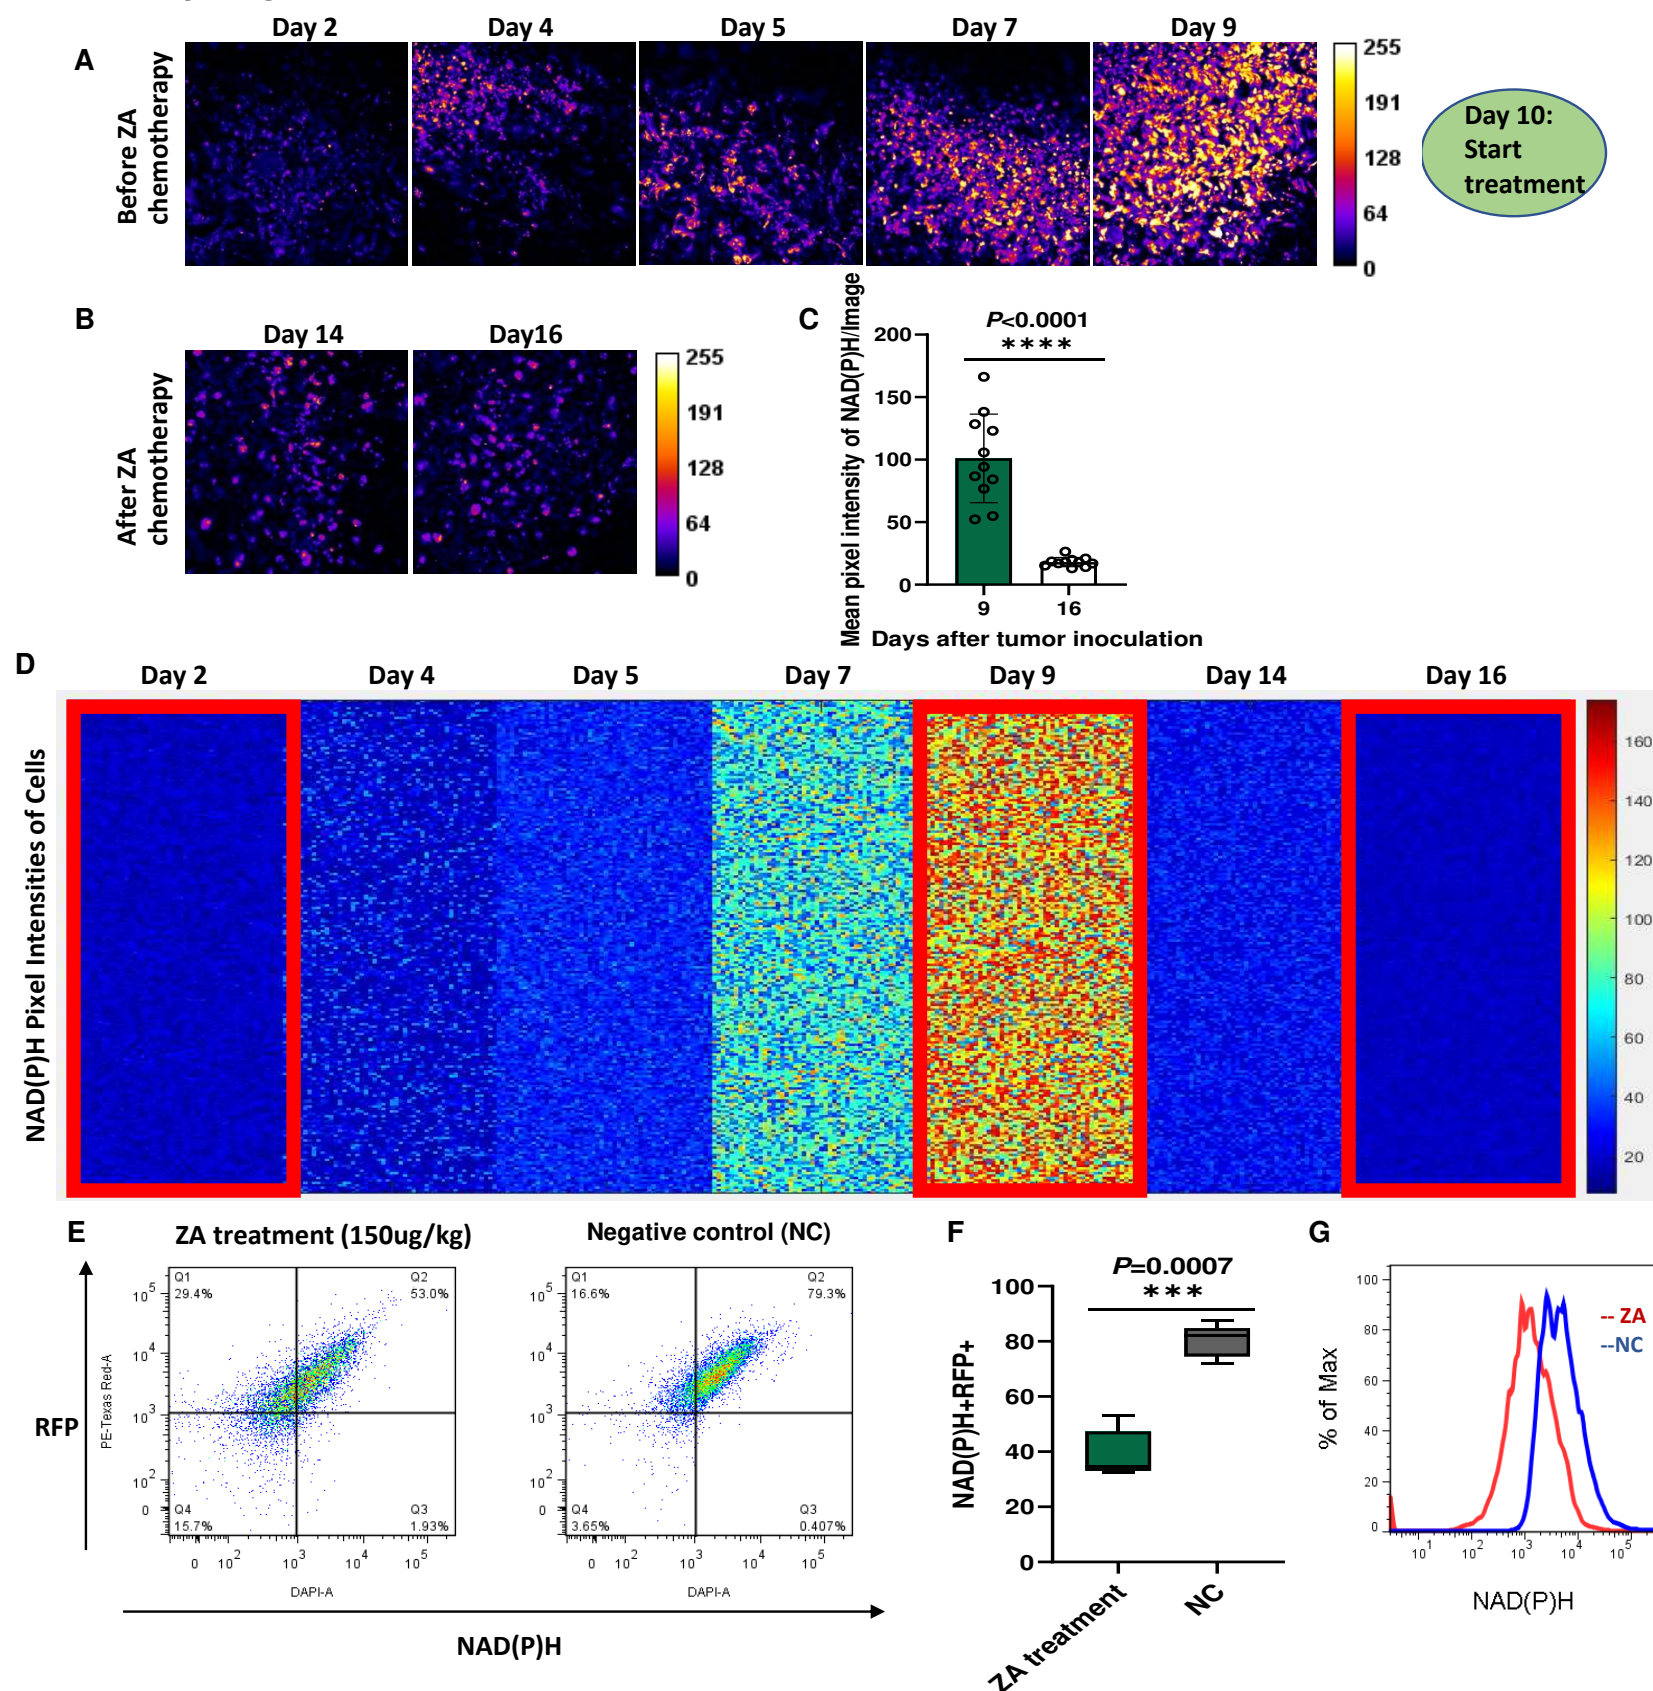

**Sensitive monitoring of zoledronic acid chemotherapy response by dynamic metabolic imaging of NAD(P)H.** (A, B) Label-free metabolic intravital imaging (LMII) of NAD(P)H demonstrates sensitive early response at single-cell level after zoledronic acid (ZA) treatment (150  $\mu$ g/kg intraperitoneal injection daily for 5 days). (C) Quantification of average intensity shows statistically significant difference in NAD(P)H signals before and after ZA treatment (n=11 images,  $P < 0.0001$  for Day 9 and Day 16). (D) Kinetics of single cell metabolism with NAD(P)H signal. Each colored small square represents the visible pixel intensity of NAD(P)H in each cancer cell. 10,000-pixel intensities were randomly measured from the cells in different mice every day for 16 days (n=6 mice). Metabolic signal of NAD(P)H has been increased with tumor growth from Day 1 to Day 9 and dramatically decreased with start of ZA treatment from Day 10. (E) Flow cytometric analysis shows decrease of NAD(P)H+RFP+ cells after ZA treatment (n=15 mice,  $P = 0.0007$ ). (E) Decreased NAD(P)H signal with ZA treatment compared to negative control treatment was confirmed by flow cytometry.



## Supplementary Figure 7

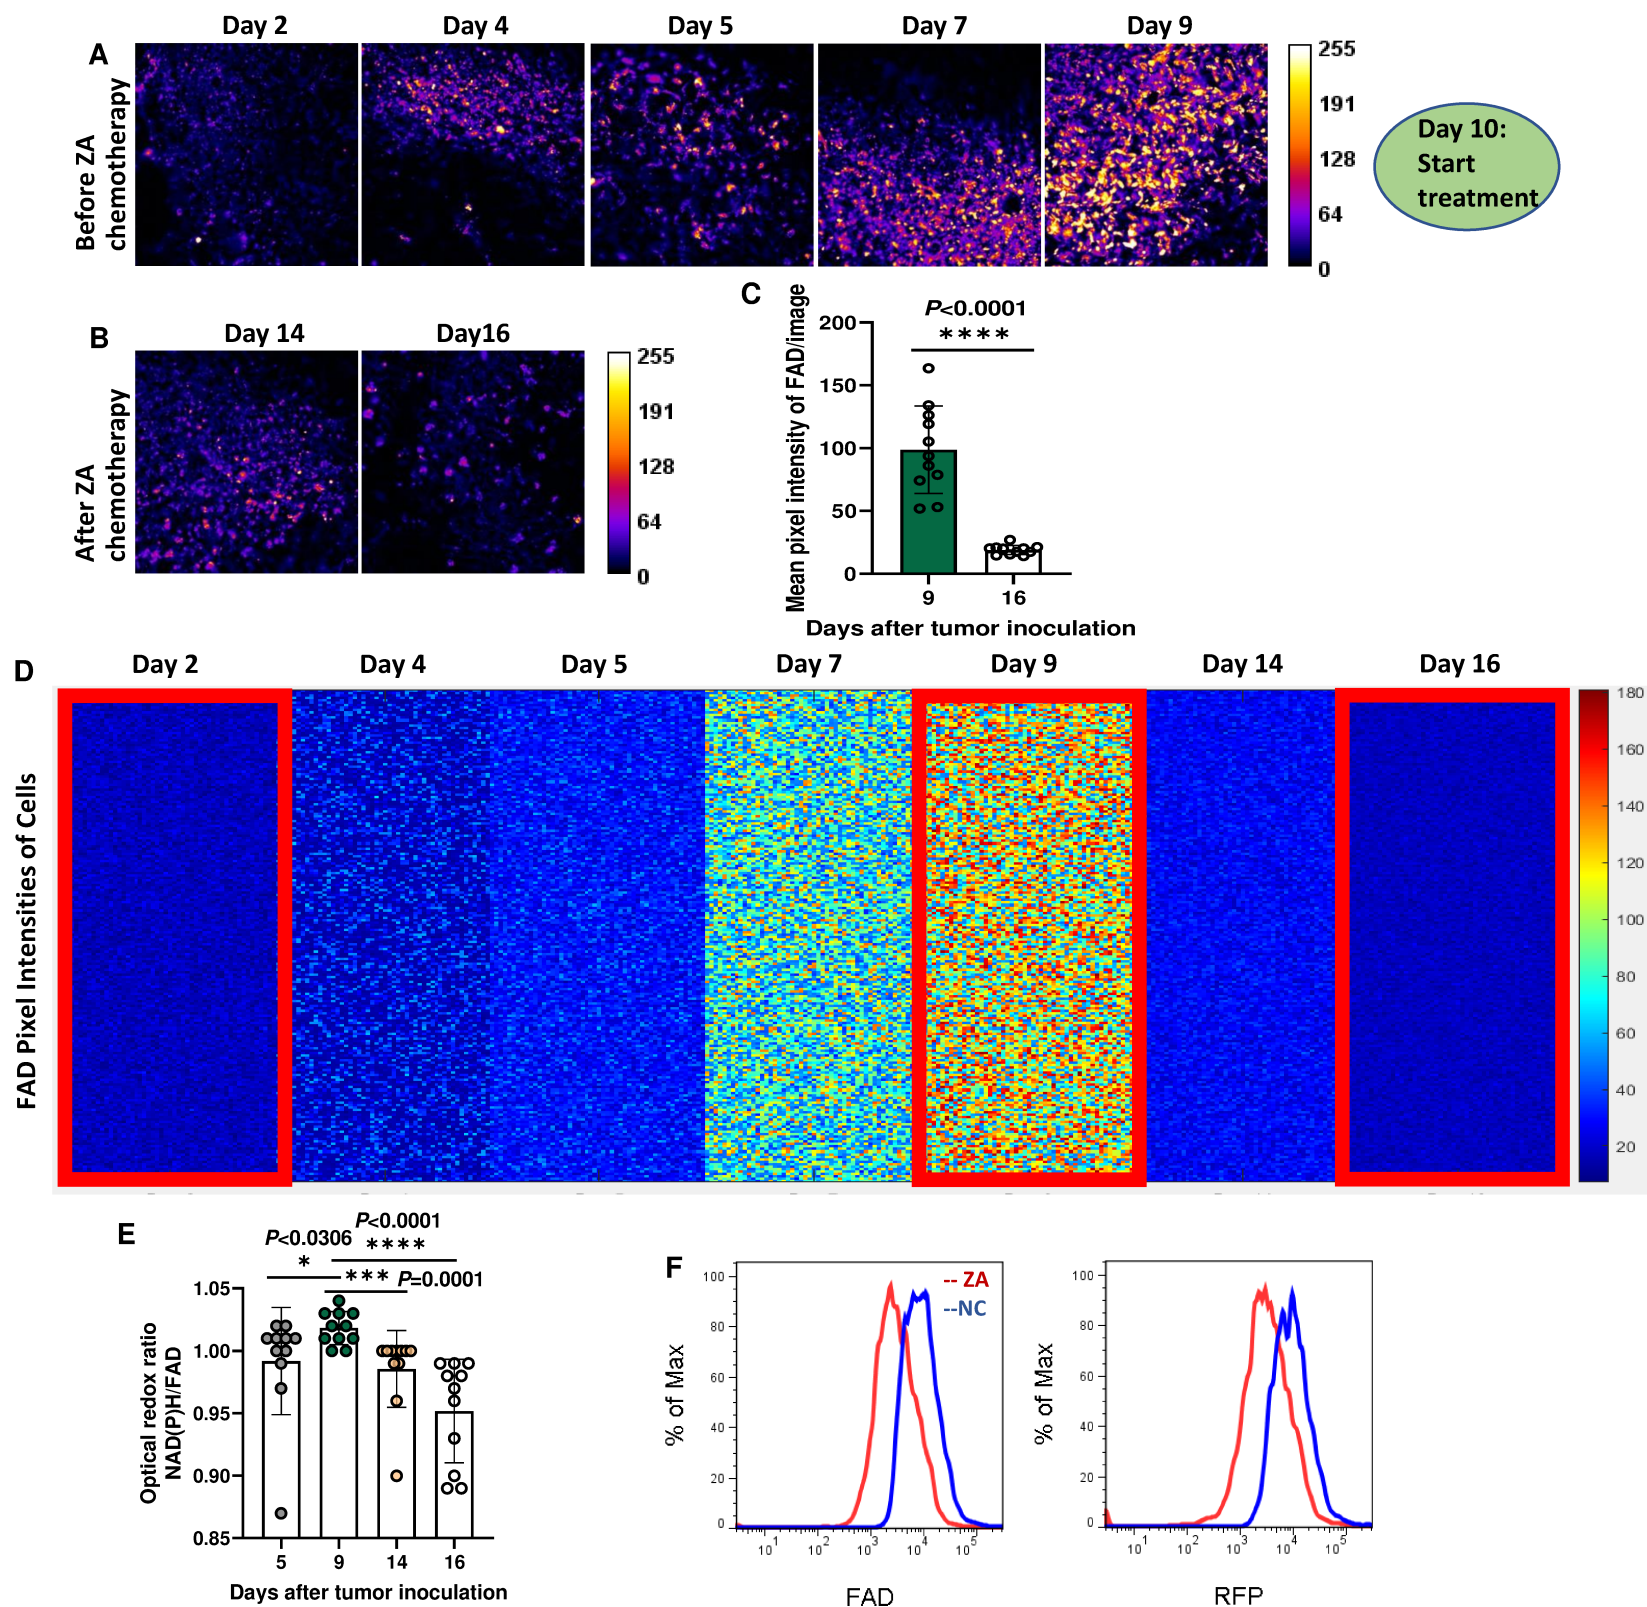

**Sensitive monitoring of zoledronic acid chemotherapy response by dynamic metabolic imaging of FAD.** (A, B) Label-free metabolic intravital imaging (LMII) of FAD demonstrates sensitive early response at single-cell level after zoledronic acid (ZA) treatment (150  $\mu\text{g}/\text{kg}$  intraperitoneal injection daily for 5 days). (C) Quantification of average intensity shows statistically significant difference in FAD signals before and after ZA treatment ( $n=11$  images,  $P < 0.0001$  for Day 9 and Day 16). (D) Kinetics of single cell metabolism with FAD signal. Each colored small square represents the visible pixel intensity of FAD in each cancer cell. 10,000-pixel intensities were randomly measured from the cells in different mice every day for 16 days ( $n=6$  mice). Metabolic signal of FAD has been increased with tumor growth from Day 1 to Day 9 and dramatically decreased with start of ZA treatment from Day 10. (E) Optical redox ratio was increased with tumor growth and decreased with ZA treatment ( $n=15$  mice,  $P < 0.0001$  for Day 9 and Day 14). (F) Flow cytometric analysis shows decrease of FAD+ cells and 4T1\_PB3R-RFP+ cells after ZA treatment.

## Supplementary Figure 8

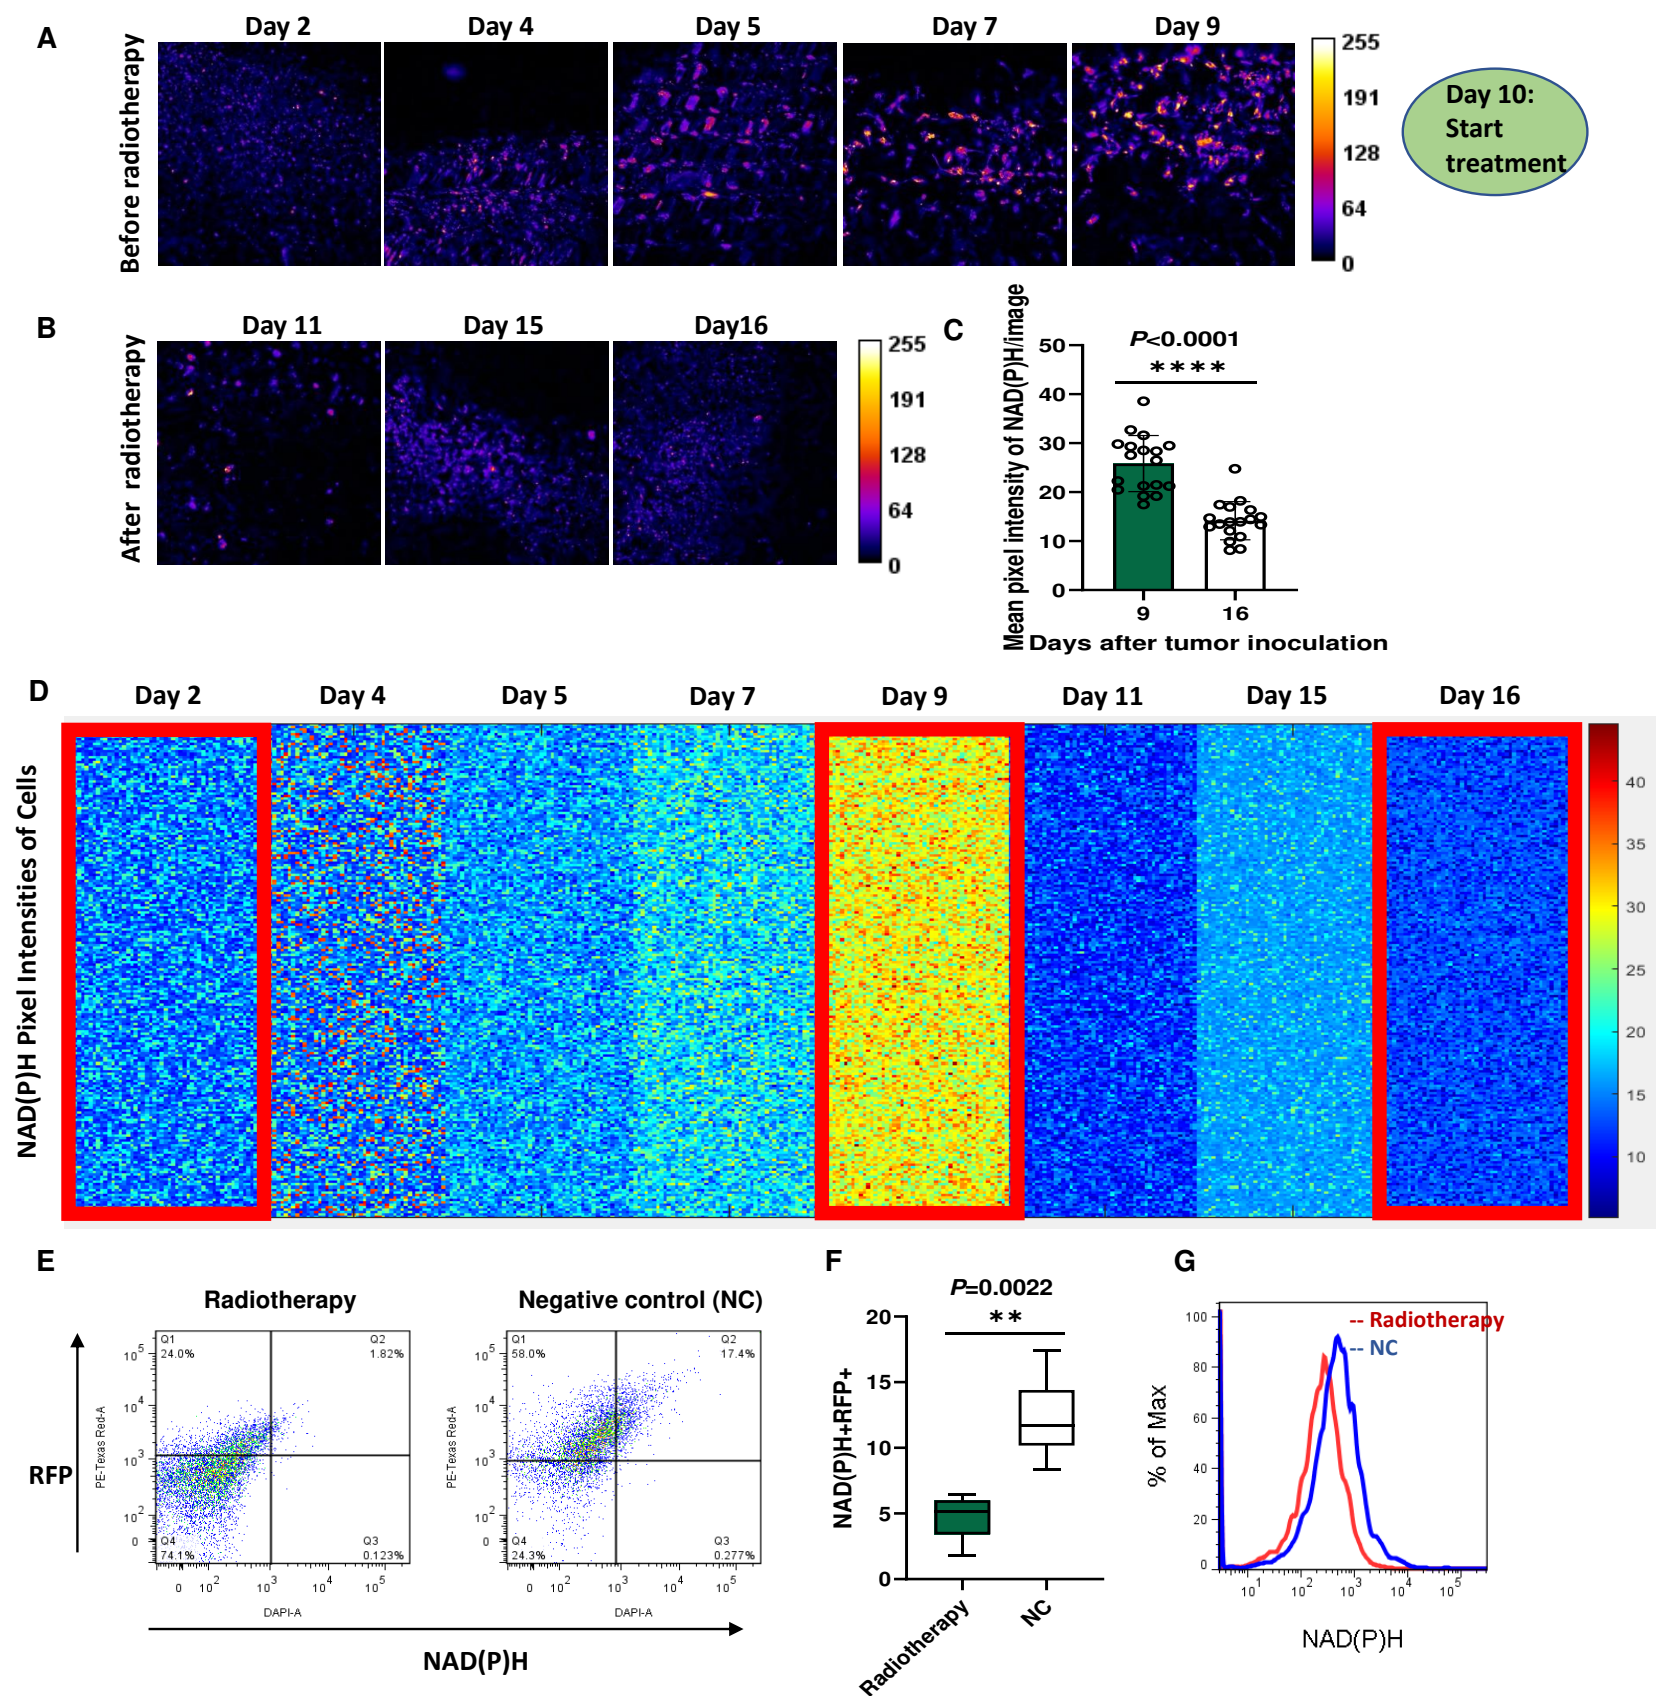

**Sensitive monitoring of radiotherapy response by dynamic metabolic imaging of NAD(P)H.** (A, B) Label-free metabolic intravital imaging (LMII) of NAD(P)H demonstrates sensitive early response at single-cell level after radiotherapy (2 Gy/daily for 4 days, rate 1.8 Gy/min). (C) Quantification of average intensity shows statistically significant difference in NAD(P)H signals before and after radiation treatment (n=18 images,  $P < 0.0001$  for Day 9 and Day 16). (D) Kinetics of single cell metabolism with NAD(P)H signal. Each colored small square represents the visible pixel intensity of NAD(P)H in each cancer cell. 10,000-pixel intensities were randomly measured from the cells in different mice every day for 16 days (n=6 mice). Metabolic signal of NAD(P)H has been increased with tumor growth from Day 1 to Day 9 and dramatically decreased with start of radiation treatment from Day 10. (E, F) Flow cytometric analysis shows decrease of NAD(P)H+RFP+ cells with radiation treatment compared to negative control (n=12 mice,  $P = 0.0022$ ). (G) Decreased NAD(P)H signal with radiation treatment compared to negative control was confirmed by flow cytometry.

## Supplementary Figure 9

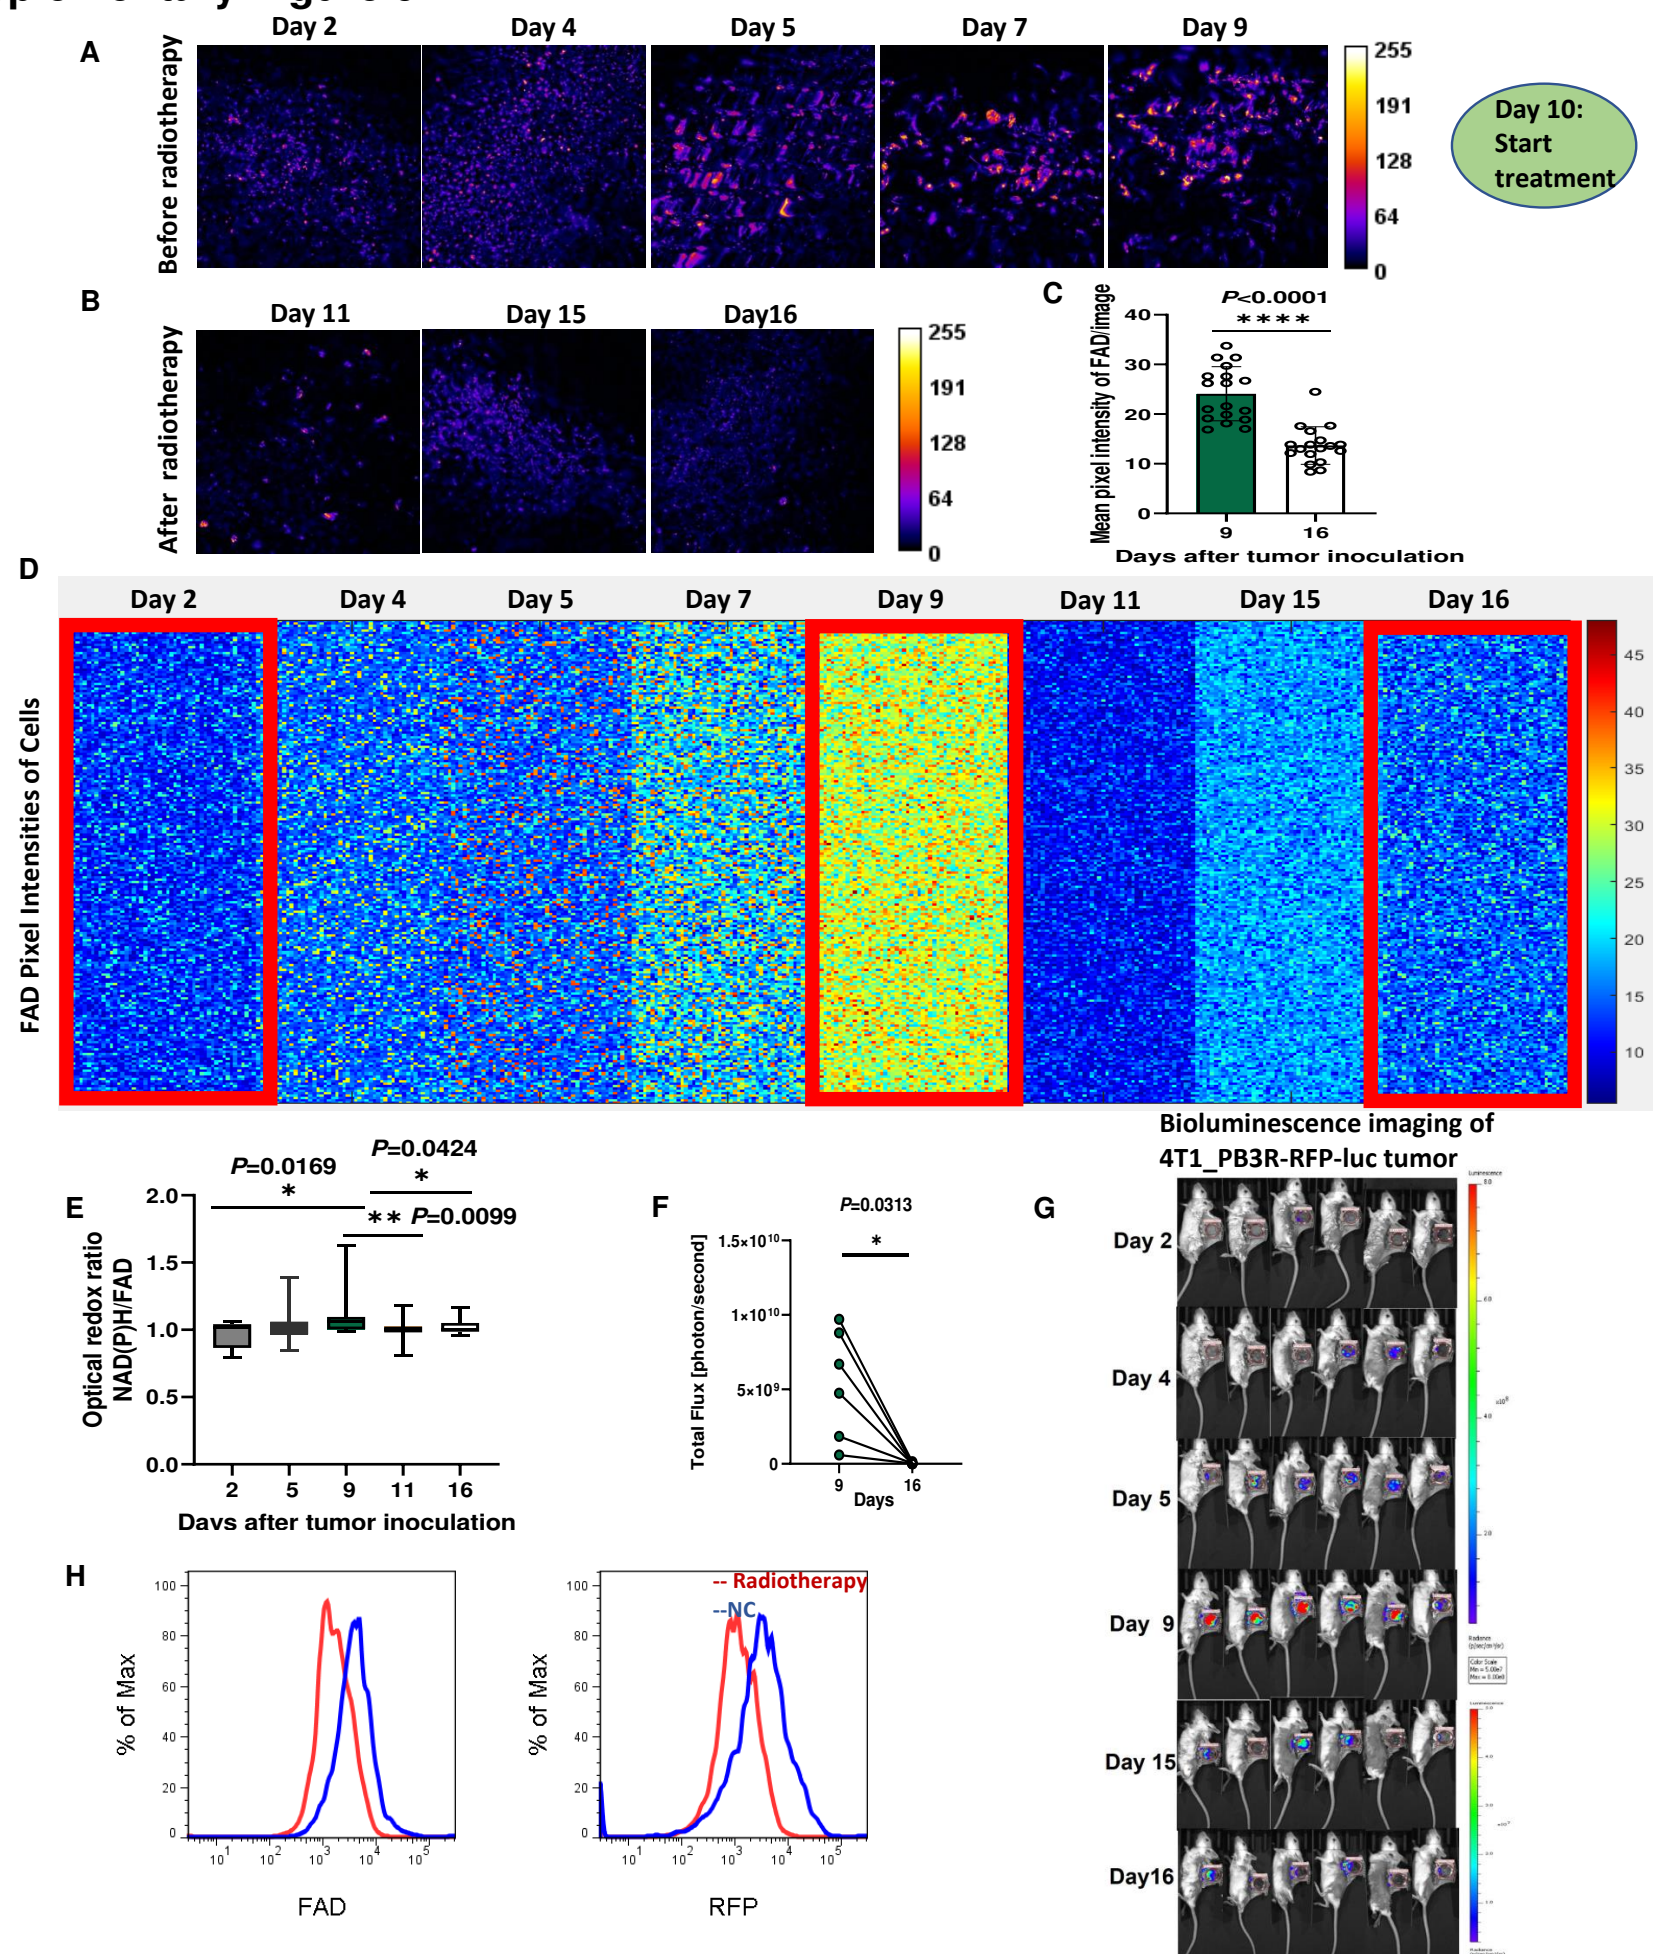

**Sensitive monitoring of radiotherapy response by dynamic metabolic imaging of FAD.** (A, B) Label-free metabolic intravital imaging (LMII) of FAD demonstrates sensitive early response at single-cell level after radiation treatment (2 Gy/daily for 4 days, rate 1.8 Gy/min). (C) Quantification of average intensity shows statistically significant difference in FAD signals before and after radiation treatment ( $n=18$  images,  $P < 0.0001$ ). (D) Kinetics of single cell metabolism with FAD signal. Each colored small square represents the visible pixel intensity of FAD in each cancer cell. 10,000-pixel intensities were randomly measured from the cells in different mice every day for 16 days ( $n=6$  mice). Metabolic signal of FAD has been increased with tumor growth from Day 1 to Day 9 and dramatically decreased with start of radiation treatment from Day 10. (E) Optical redox ratio was increased with tumor growth and decreased with radiation treatment ( $n=6$ ,  $P=0.0424$  for Day 9 and Day 14). (F, G) Conventional whole-body bioluminescence imaging of 4T1\_PB3R-RFP-luc tumor mice verified cancer treatment with increased signal before radiotherapy and decreased signal after radiotherapy ( $n=6$  mice). LMII shows better sensitivity to detect radiotherapy response ( $P < 0.0001$  in C) over bioluminescence imaging ( $P=0.0313$  in F). (H) Flow cytometric analysis shows decrease of FAD+ cells and 4T1\_PB3R-RFP+ cells after radiation treatment.

## Supplementary Figure 10

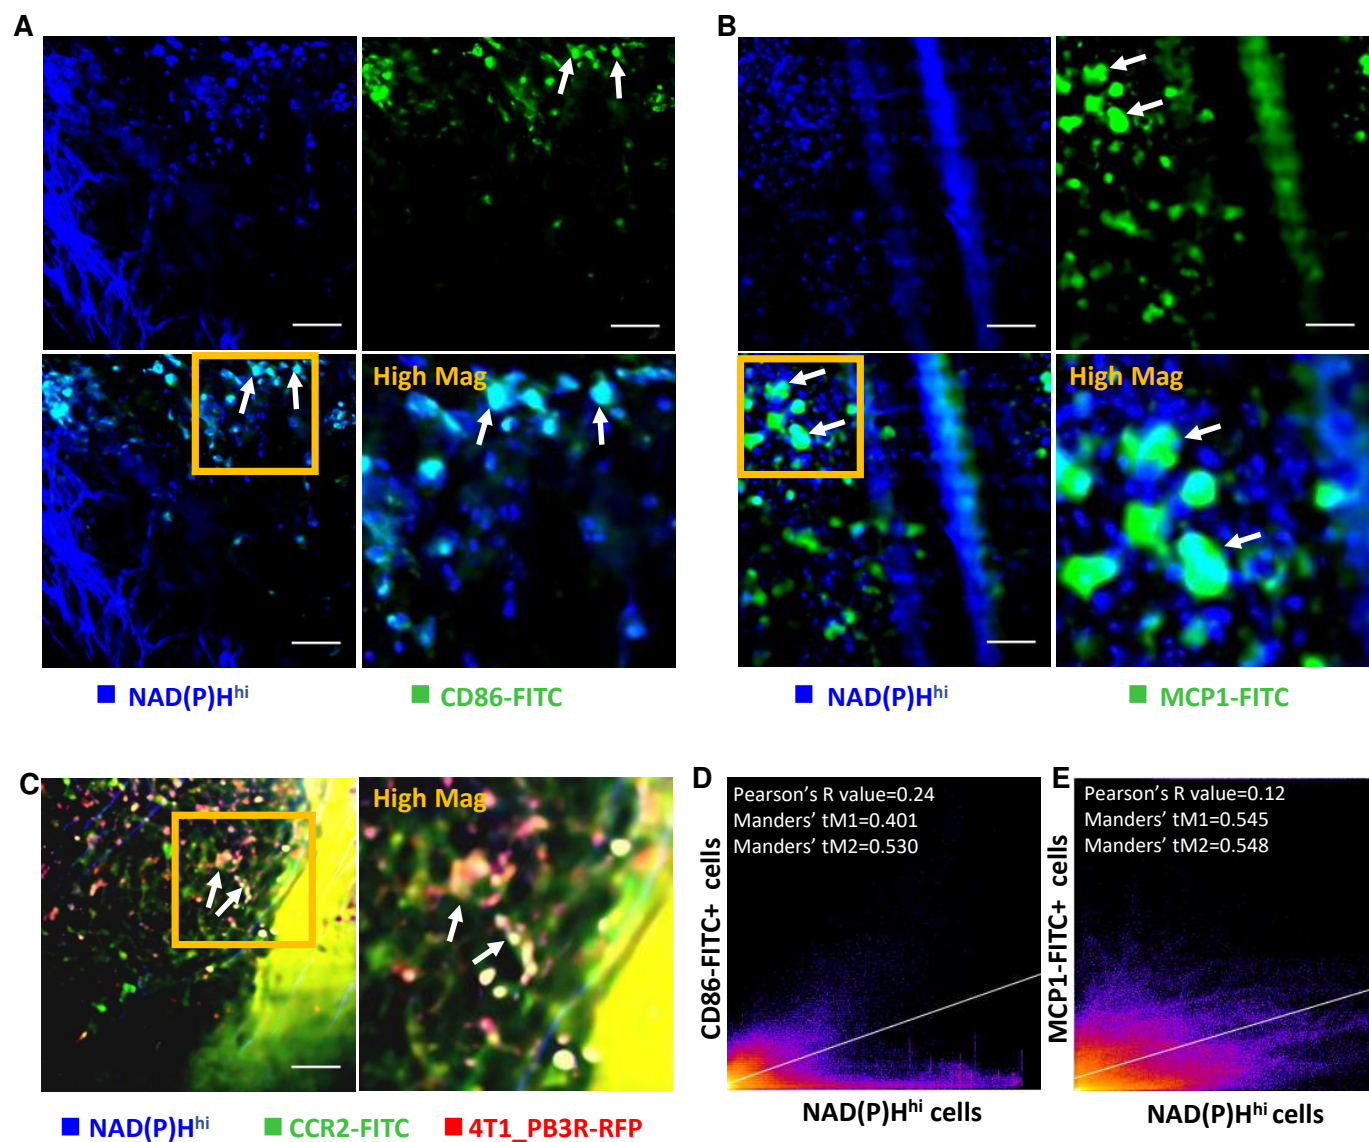

**Intravital imaging reveals co-localization of NAD(P)H<sup>hi</sup> cells and M1 macrophages in tumor microenvironment.** (A) Representative intravital images of NAD(P)H<sup>hi</sup> cells (blue) and CD86-FITC<sup>+</sup> cells (green). Arrows indicate *in vivo* co-localization of NAD(P)H<sup>hi</sup> cells and CD86-FITC<sup>+</sup> cells. (B) Representative intravital images of NAD(P)H<sup>hi</sup> cells (blue) and MCP1-FITC<sup>+</sup> cells (green). Arrows indicate *in vivo* co-localization of NAD(P)H<sup>hi</sup> cells and MCP1-FITC<sup>+</sup> cells. (C) Representative intravital images of NAD(P)H<sup>hi</sup> cells (blue), 4T1\_PB3R-RFP<sup>+</sup> cells (red), and CCR2-FITC<sup>+</sup> cells (green). Arrows indicate *in vivo* co-localization of NAD(P)H<sup>hi</sup> cells and CCR2-FITC<sup>+</sup> cells. Scales, 20  $\mu$ m. (D) Quantitative co-localization analysis using Pearson's coefficient and Manders coefficients revealed that a small portion of NAD(P)H<sup>hi</sup> cells are targeting immune-active M1 macrophages visualized by fluorescent CD86 antibody or specific peptide based fluorescent probes targeting MCP1 or CCR2 in triple-negative breast cancer models. Scales, 20  $\mu$ m.

## Supplementary Figure 11

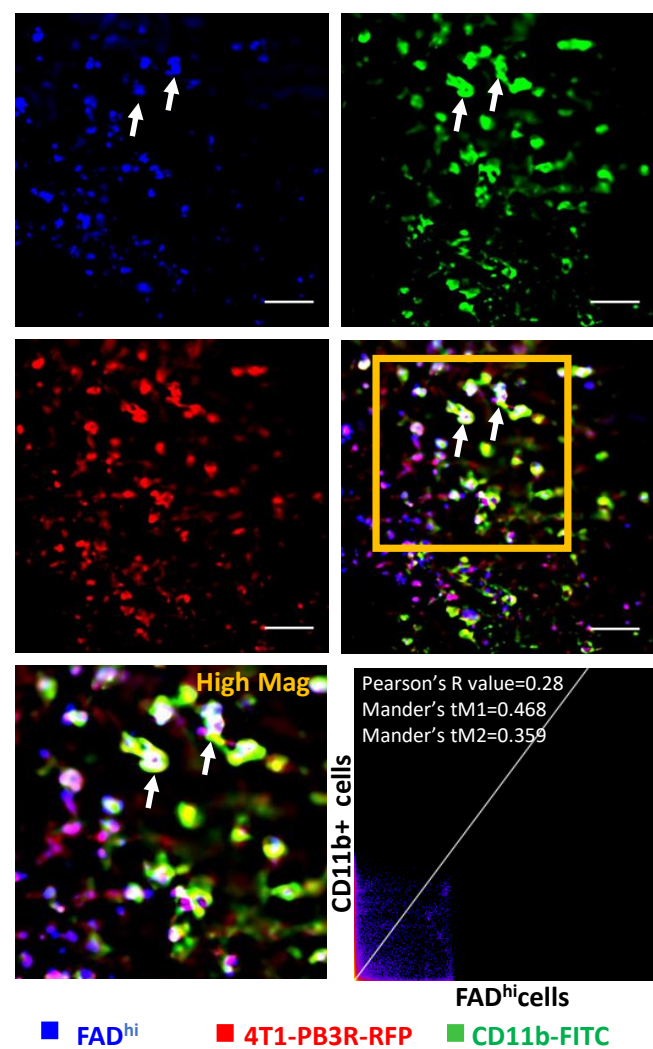

**Intravital imaging reveals co-localization of FAD<sup>hi</sup> and CD11b<sup>+</sup> macrophages in tumor microenvironment.** Representative intravital images of FAD<sup>hi</sup> cells (blue), 4T1\_3BR-RFP+ cells (red), and CD11b<sup>+</sup> macrophages (green) in a mouse model of triple-negative breast cancer. Arrows indicate *in vivo* co-localization of FAD<sup>hi</sup> cells and CD11b<sup>+</sup> macrophages. Quantitative co-localization analysis using Pearson's coefficient and Manders coefficients revealed targeting ability of metabolic FAD imaging for CD11b<sup>+</sup> macrophages. Scales, 20  $\mu$ m.

## Supplementary Figure 12

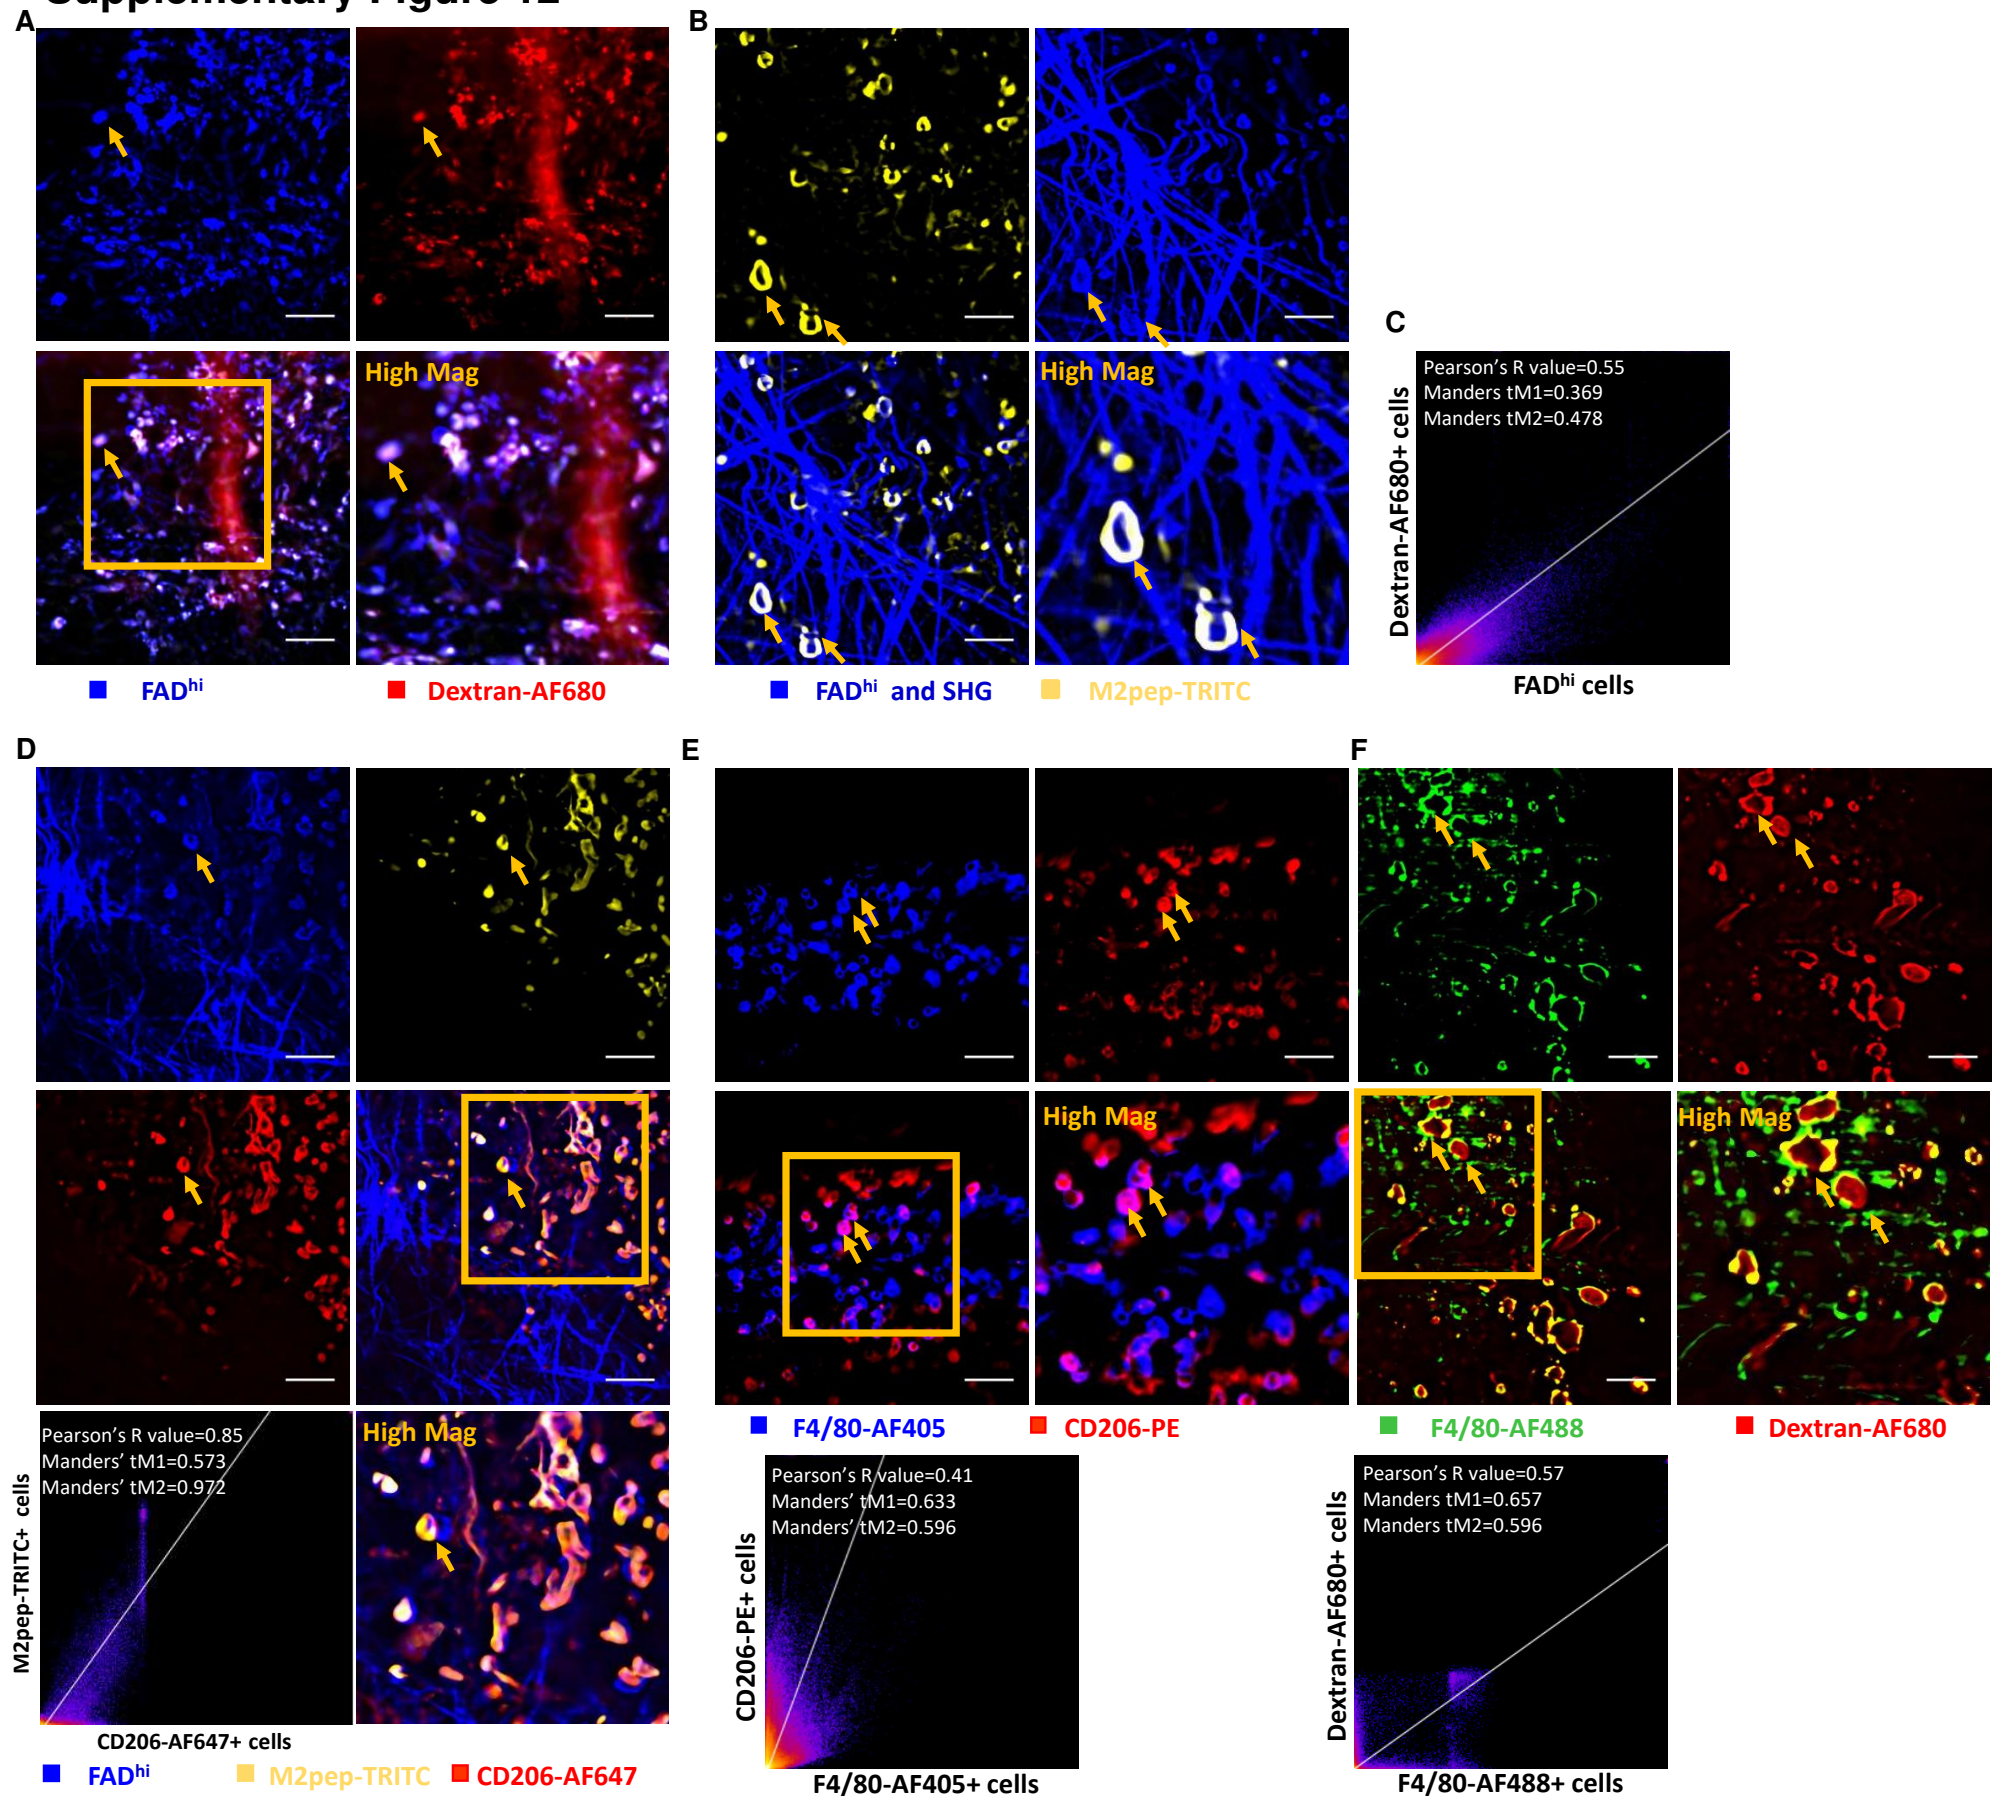

**Intravital imaging reveals co-localization of FAD<sup>hi</sup> cells and M2 macrophages in tumor microenvironment.** (A) Representative intravital images of FAD<sup>hi</sup> cells (blue) and Dextran-AF680+ cells (red). (B) Representative intravital images of FAD<sup>hi</sup> cells (green) and M2pep-TRITC+ cells (yellow). (C) A scatter plot depicting quantitative co-localization analysis between FAD<sup>hi</sup> cells and Dextran-AF680+ cells using Pearson's coefficient and Manders coefficients. (D) Representative intravital images of FAD<sup>hi</sup> cells (blue), M2pep-TRITC+ cells (yellow), and CD206-AF607+ cells (red) and a scatter plot showing quantitative co-localization analysis. (E) Representative intravital images of F4/80-AF405+ cells (blue) and CD206-PE+ cells (yellow) and a scatter plot showing quantitative co-localization analysis. (F) Representative intravital images of F4/80-AF488+ cells and Dextran-AF680+ cells and a scatter plot showing quantitative co-localization analysis. *In vivo* co-localization analysis shows specific targeting ability of metabolic FAD imaging for immunosuppressive M2 macrophages visualized by high uptake of Dextran-AF680 or by M2 macrophage specific peptide based fluorescent imaging probe, M2pep-TRITC in triple-negative breast cancer models. *In vivo* targeting ability of M2pep-TRITC and Dextran-AF680 was verified by *in vivo* immunostaining using CD206 or F4/80. Scales, 20  $\mu$ m. Representative co-localized cells are indicated by arrows.

## Supplementary Figure 13

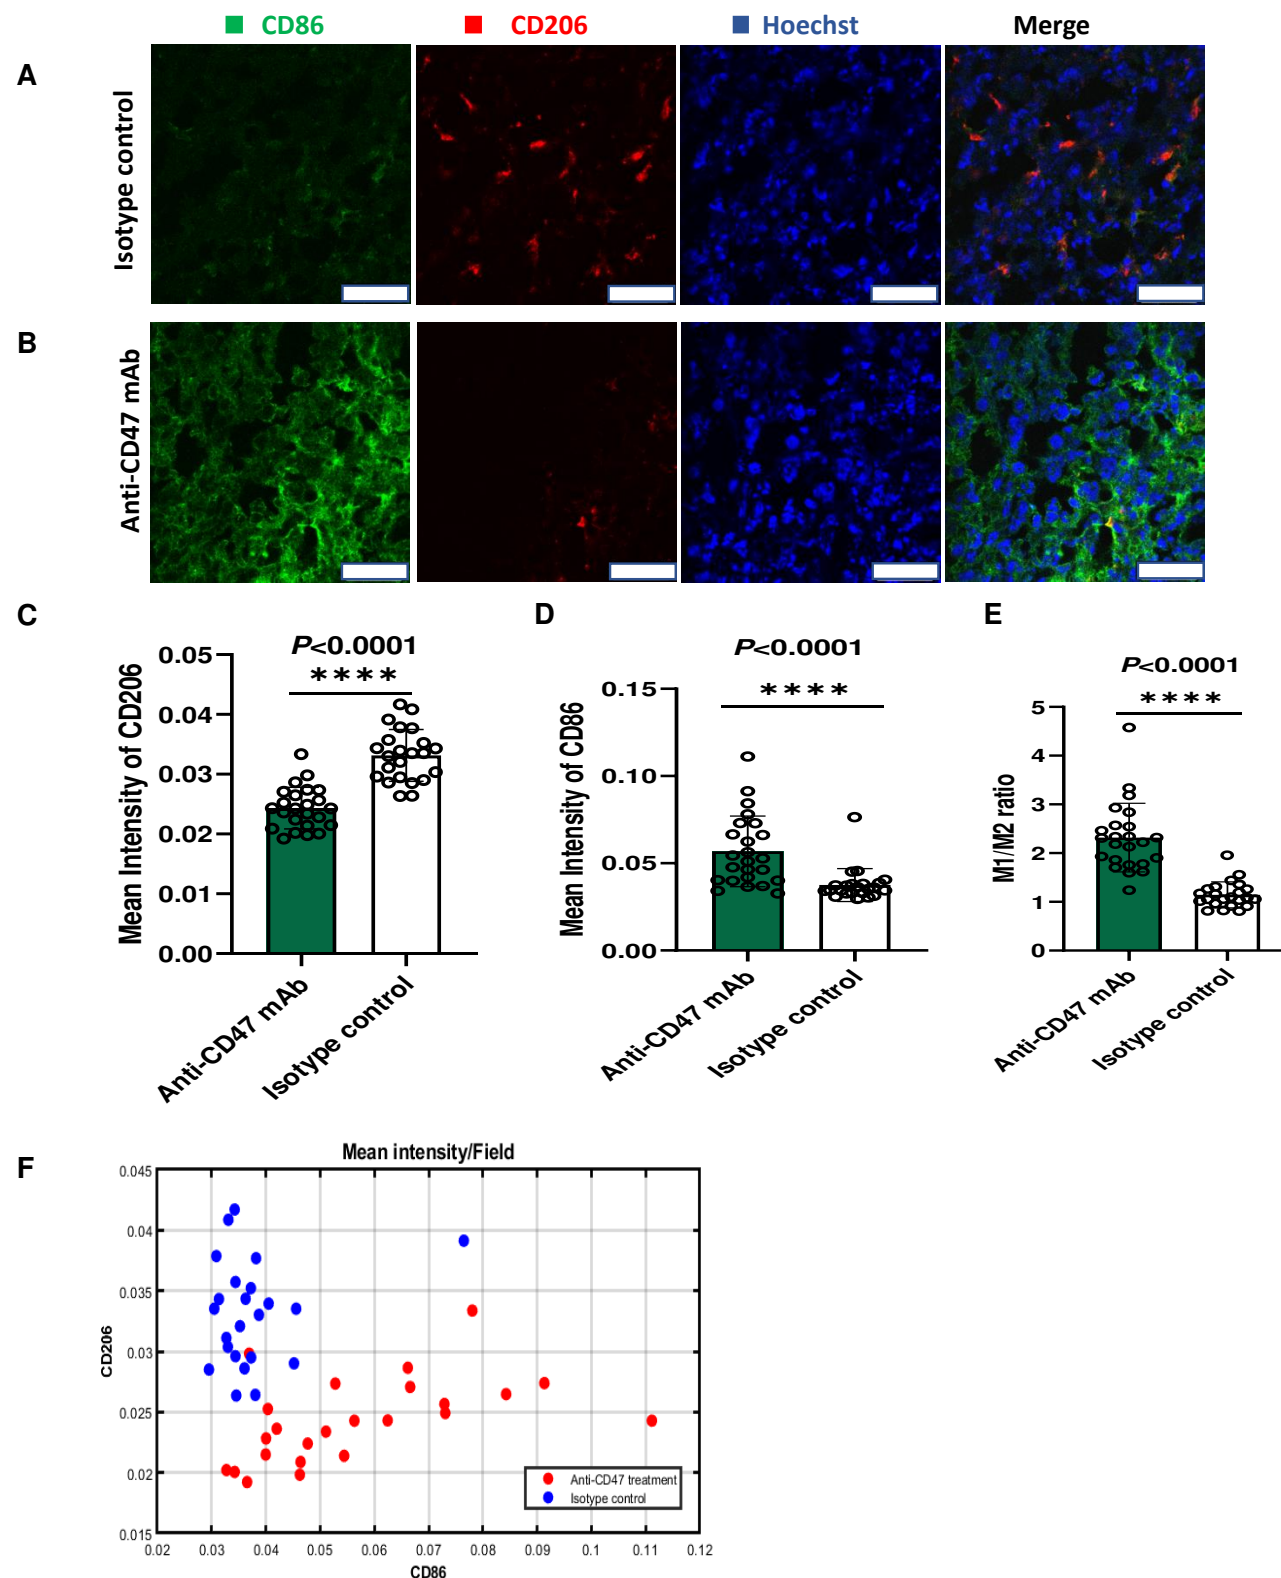

**Histological examination of tumor-associated macrophages' polarization by anti-CD47 therapy.** (A, B) Representative immunofluorescence images stained by anti-CD86 and anti-CD206 antibodies in 4T1 tumor tissue 5 days post injection of isotype control antibody or anti-CD47 mAb in mouse models of triple-negative breast cancer. Scales, 25  $\mu$ m. (C, D) Quantitative average intensity analysis showing that anti-CD47 mAb treatment inhibited CD206+ immunosuppressive M2 macrophages and promoted CD86+ immune-active phagocytotic M1 macrophages ( $P < 0.0001$  between anti-CD47 mAb and isotype control antibody treated tumors) (E, F) A high M1/M2 ratio is detected in 4T1 tumor-bearing mice with anti-CD47 mAb treatment for 5 days ( $P < 0.0001$  between anti-CD47 mAb and isotype control antibody treated tumors).

## Supplementary Figure 14

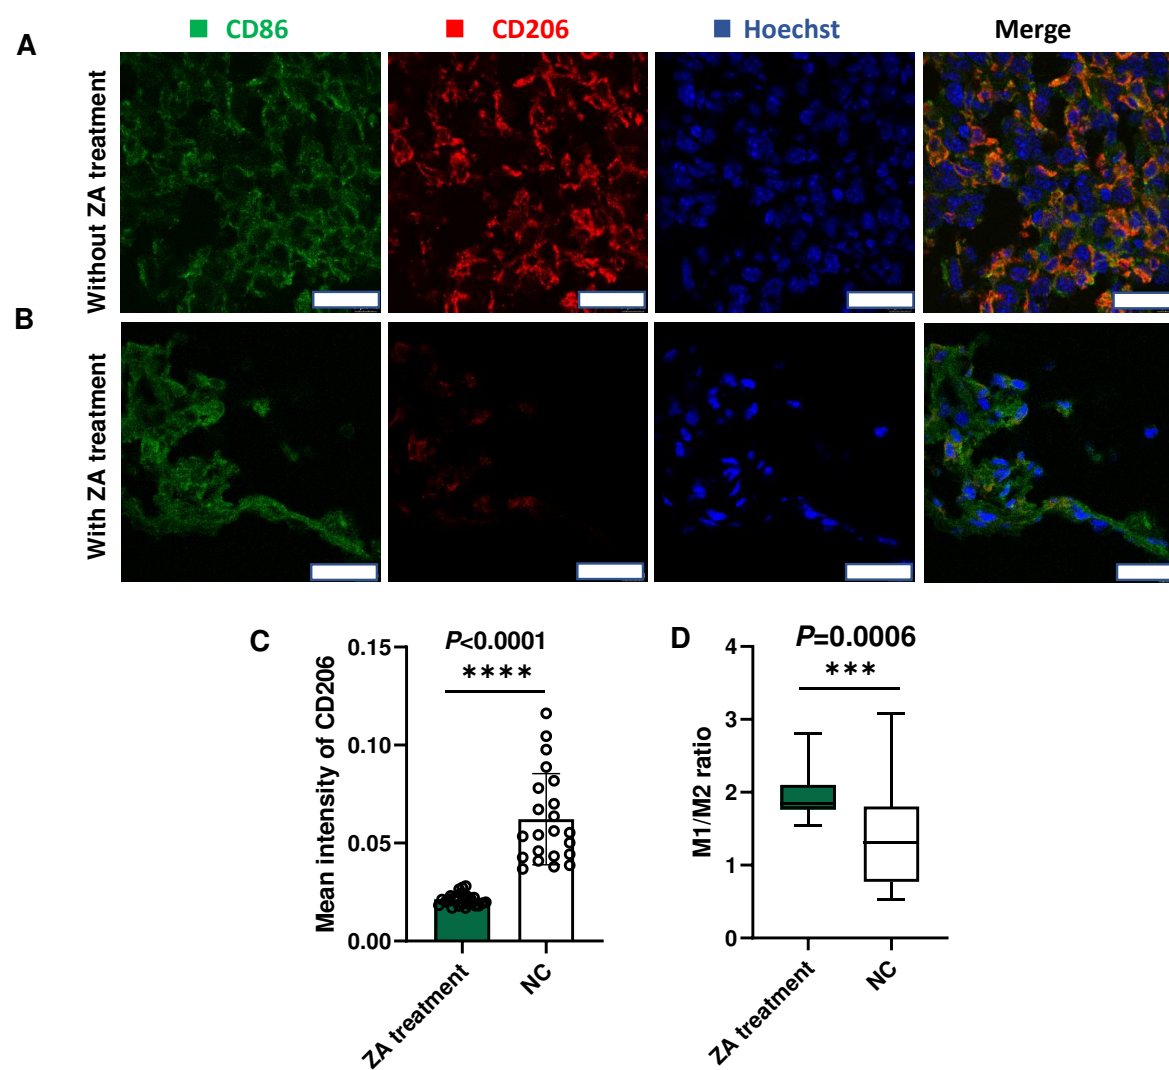

**Histological examination of tumor-associated macrophages' polarization by zoledronic acid chemotherapy.** (A, B) Representative immunofluorescence images stained by anti-CD86 and anti-CD206 antibodies in 4T1 tumor tissue 5 days post injection of negative control or zoledronic acid chemotherapy in mouse models of triple-negative breast cancer. Scales, 25  $\mu$ m. (C) Quantitative average intensity analysis showing that zoledronic acid chemotherapy inhibited CD206+ immunosuppressive M2 macrophages ( $P < 0.0001$  between zoledronic acid chemotherapy and negative control treated tumors) (D) A high M1/M2 ratio is detected in 4T1 tumor-bearing mice with zoledronic acid chemotherapy for 5 days ( $P = 0.0006$  between zoledronic acid chemotherapy and negative control treated tumors).



## Supplementary Figure 15

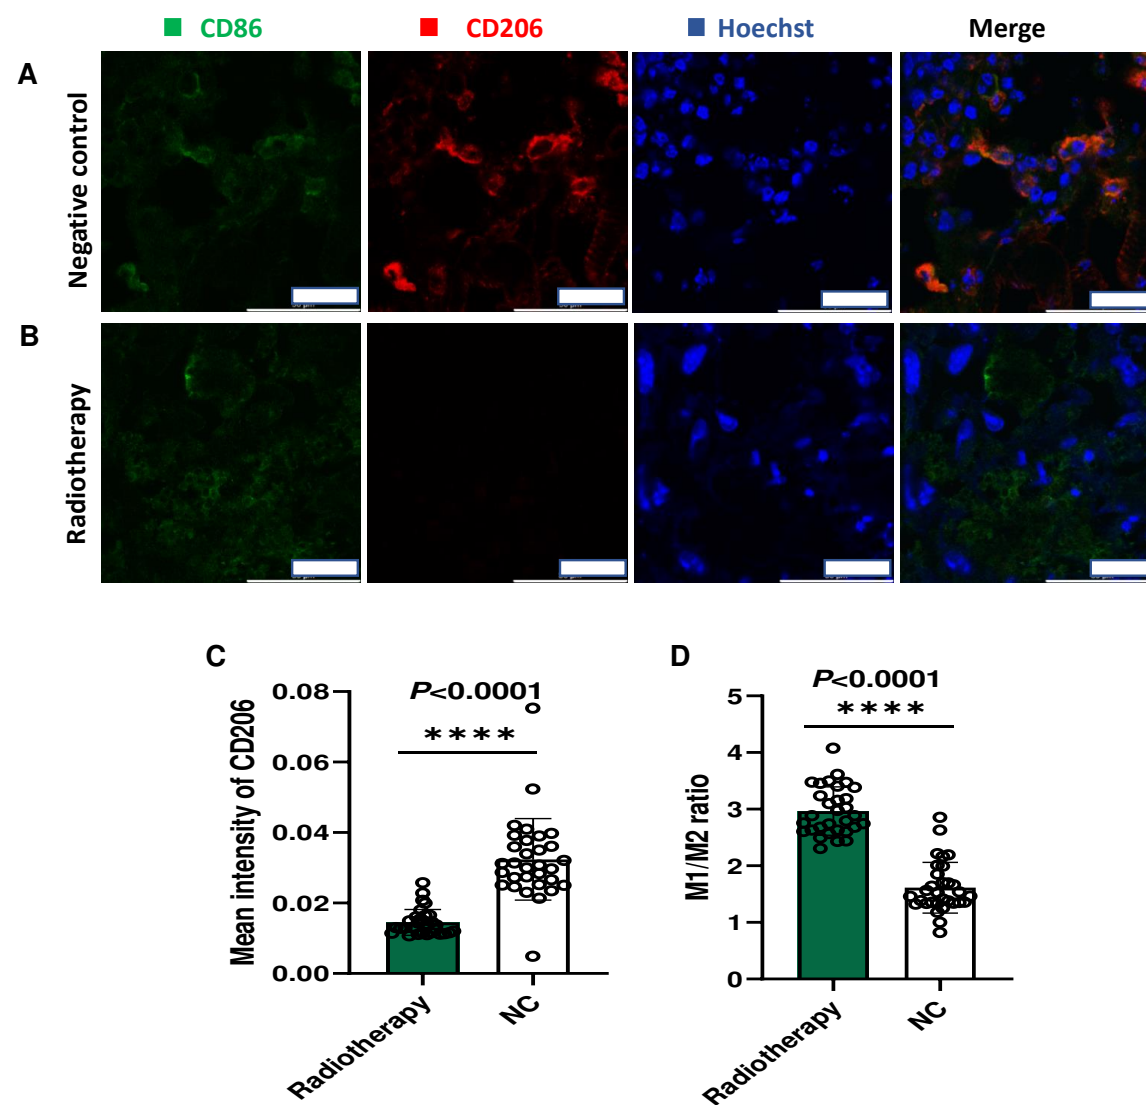

**Histological examination of tumor-associated macrophages' polarization by radiotherapy.** (A, B) Representative immunofluorescence images stained by anti-CD86 and anti-CD206 antibodies in 4T1 tumor tissue after radiotherapy (2 Gy/daily for 4 days, rate 1.8 Gy/min) in mouse models of triple-negative breast cancer. Scales, 25  $\mu$ m. (C) Quantitative average intensity analysis showing that radiation treatment inhibited CD206+ immunosuppressive M2 macrophages ( $P < 0.0001$  between radiotherapy and negative control treated tumors) (D) A high M1/M2 ratio is detected in 4T1 tumor-bearing mice with radiation treatment for 4 days ( $P < 0.0001$  between radiotherapy and negative control treated tumors).

## Supplementary Table 1

### Lists of antibodies, imaging probes, immune checkpoint inhibitors, and chemotherapeutic drugs

| Immune-active cells                            | NAD(P)H <sup>hi</sup> cells | Antibodies or imaging probes                                                                                | Immunosuppressive cells         | FAD <sup>hi</sup> cells | Antibodies or imaging probes                                                                         |
|------------------------------------------------|-----------------------------|-------------------------------------------------------------------------------------------------------------|---------------------------------|-------------------------|------------------------------------------------------------------------------------------------------|
| Helper T cells                                 | Colocalization              | CD4-FITC mAb (BD Biosciences, USA, 1:3 dilution)                                                            | M2 macrophages                  | Colocalization          | CD206-AF647 mAb (BD Biosciences, USA, 1:3 dilution)                                                  |
| Dendritic cells                                | Colocalization              | CD11c-FITC mAb (BD Biosciences, USA, 1:3 dilution)                                                          | M2 macrophages                  | Colocalization          | CD301b-AF647 mAb (Biolegend, USA, 1:3 dilution)                                                      |
| Pan macrophages                                | Colocalization              | F4/80-PE mAb, F4/80-AF488 mAb (Abcam, 1:3 dilution)                                                         | M2 macrophages                  | Colocalization          | M2pep-TRITC (150 µg/mouse diluted in 100 µl of 1% BSA-PBS)                                           |
| M1 macrophages                                 | Colocalization              | MCP1-FITC (150 µg/mouse diluted in 100 µl of 1% BSA-PBS); CD86-FITC mAb (BD Biosciences, USA, 1:3 dilution) | M2 macrophages                  | Colocalization          | Dextran-AF680 (450 µg/mouse diluted in 100 µl of 1% BSA-PBS)                                         |
| M1 macrophages                                 | Colocalization              | CCR2-FITC (30 µg/mouse diluted in 100 µl of 1% BSA-PBS)                                                     | Regulatory T cells              | Colocalization          | CD4-FITC mAb (BD Biosciences, USA, 1:3 dilution) and CD25-PE mAb (BD Biosciences, USA, 1:3 dilution) |
| <b>CD47-SIRPα pathway</b>                      |                             | <b>Antibodies</b>                                                                                           | <b>Treatments</b>               |                         | <b>Antibodies and drugs</b>                                                                          |
|                                                | CD47 antigens               | anti-mouse CD47-AF488 mAb                                                                                   | Immunotherapy (MIAP301)         |                         | anti-mouse CD47 mAb (clone MIAP301, Rat IgG2a, κ, BioXcell, USA)                                     |
|                                                | Pan macrophages             | F4/80-PE mAb (Abcam, USA)                                                                                   | Immunotherapy (Isotype control) |                         | Rat IgG2a isotype control mAb (clone 2A3, Rat IgG2a, κ, BioXcell, USA)                               |
| <b>Comparative studies</b>                     |                             | <b>Reagents or imaging probes</b>                                                                           | Chemotherapy                    |                         | Paclitaxel (PTX) (SelleckChem, USA)                                                                  |
| Whole-body bioluminescence imaging by IVIS     |                             | D-luciferins (Promega, USA)                                                                                 | Chemotherapy                    |                         | Zoledronic acid (ZA) (SelleckChem, USA)                                                              |
| Whole-body fluorescent glucose imaging by IVIS |                             | IVISense 2-DG 750 Fluorescent Probe in RediJect™ Solution (PerkinElmer, USA)                                |                                 |                         |                                                                                                      |

## Supplementary Video Legends

### Supplementary Video 1

Skinfold window chamber models with transplantation of 4T1-PB3R-RFP+ murine triple-negative breast cancer cells

### Supplementary Video 2

***In vivo* observation of co-localization among NAD(P)<sup>H</sup><sup>hi</sup> metabolic signal, F4/80+ macrophages, and anti-CD47 mAb treated cancer cells.** A large number of co-localized cells among different populations of NAD(P)<sup>H</sup><sup>hi</sup> cell (blue), F4/80-PE targeted macrophages (red), and CD47-AF488 targeted cancer cells (green) are observed by intravital imaging. Using a window chamber model of 4T1 triple-negative breast cancer, label-free metabolic intravital imaging of NAD(P)<sup>H</sup> enabled visualization of anti-CD47 drug (green) accumulation in NAD(P)<sup>H</sup><sup>hi</sup> cancer cells (blue) and engulfment of cancer cells by F4/80+ macrophages (red) following subcutaneous injection of a mixture of anti-F4/80-PE mAb and anti-CD47-AF488 mAb in 1% BSA-PBS under fascia.

### Supplementary Video 3

***In vivo* observation of antibody-dependent cellular phagocytosis (ADCP) events.** Upon the administration of anti-CD47-AF488 mAb and anti-F4/80-PE mAb, ADCP events were observed as rapid but short waves between F4/80-PE labeled macrophages (red) and CD47-AF488 mAb treated cancer cells (green). Fibrillary structures (blue) indicate collagen visualized by second harmonic generation.

### Supplementary Video 4

***In vivo* observation of antibody-dependent cellular phagocytosis (ADCP) events using NAD(P)<sup>H</sup> metabolic imaging.** Upon the administration of anti-CD47-AF488 mAb and anti-F4/80-PE mAb, ADCP events were observed as rapid but short waves between F4/80-PE labeled macrophages (red) and NAD(P)<sup>H</sup><sup>hi</sup> cancer cells (blue) in a skinfold mouse cancer model.

### Supplementary Video 5

**Representative intravital imaging showing high overlap between NAD(P)<sup>H</sup><sup>hi</sup> cells and CD11c+ dendritic cells.** *In vivo* immunofluorescence staining by subcutaneous injection anti-CD11c-FITC mAb demonstrated high co-localization between NAD(P)<sup>H</sup><sup>hi</sup> cells (blue) and immune-active CD11c+ dendritic cells in a skinfold mouse cancer model. 4T1\_PB3R-RFP+ cancer cells (red) were imaged together.

### Supplementary Video 6

**Representative intravital imaging showing high overlap between NAD(P)<sup>H</sup><sup>hi</sup> cells and MCP1-FITC labelled M1 macrophages.** Tail vein administration of MCP1-FITC imaging probe in a skinfold mouse cancer model enables evaluation of *in vivo* targeting ability of metabolic NAD(P)<sup>H</sup> imaging toward immune-active phagocytotic M1 macrophages. MCP1-FITC labelled macrophages are shown in green, 4T1-PB3R-RFP+ cancer cells are shown in red, and NAD(P)<sup>H</sup><sup>hi</sup> cells are shown in blue.

### Supplementary Video 7

**Representative intravital imaging showing high overlap between NAD(P)<sup>H</sup><sup>hi</sup> cells and CCR2-FITC labelled M1 macrophages.** Tail vein administration of CCR2-FITC imaging probe in a skinfold mouse cancer model enables evaluation of *in vivo* targeting ability of metabolic NAD(P)<sup>H</sup> imaging toward immune-active phagocytotic M1 macrophages. CCR2-FITC labelled macrophages are shown in green, 4T1-PB3R-RFP+ cancer cells are shown in red, and NAD(P)<sup>H</sup><sup>hi</sup> cells are shown in blue.
